# **Activity of the *C. elegans* egg-laying behavior circuit is controlled by competing activation and feedback inhibition**

Kevin M. Collins<sup>1,2,6</sup>, Addys Bode<sup>1</sup>, Robert W. Fernandez<sup>2</sup>, Jessica E. Tanis<sup>2,4</sup>, Jacob Brewer<sup>2</sup>,  
Matt Creamer<sup>3,5</sup>, and Michael R. Koelle<sup>2,3</sup>

<sup>1</sup> Department of Biology, University of Miami, Coral Gables, FL USA

<sup>2</sup> Department of Molecular Biophysics and Biochemistry, Yale University, New Haven, CT USA

<sup>3</sup> Interdepartmental Neuroscience Program, Yale University, New Haven, CT USA

<sup>4</sup> Present address: Department of Biological Sciences, University of Delaware, Newark, DE  
USA

<sup>5</sup> Present address: Department of Molecular, Cellular, and Developmental Biology, Yale  
University, New Haven, CT USA

<sup>6</sup>To whom correspondence should be addressed:

[kcollins@bio.miami.edu](mailto:kcollins@bio.miami.edu)

Department of Biology

University of Miami

1301 Memorial Drive

Coral Gables, FL 33143

Tel: (305) 284-9058

## 21 **Abstract**

22 Like many behaviors, *Caenorhabditis elegans* egg laying alternates between inactive and  
 23 active states. To understand how the underlying neural circuit turns the behavior on and off, we  
 24 optically recorded circuit activity in behaving animals while manipulating circuit function using  
 25 mutations, optogenetics, and drugs. In the active state, the circuit shows rhythmic activity  
 26 phased with the body bends of locomotion. The serotonergic HSN command neurons initiate  
 27 the active state, but accumulation of unlaid eggs also promotes the active state independent of  
 28 the HSNs. The cholinergic VC motor neurons slow locomotion during egg-laying muscle  
 29 contraction and egg release. The uv1 neuroendocrine cells mechanically sense passage of  
 30 eggs through the vulva and release tyramine to inhibit egg laying, in part via the LGC-55  
 31 tyramine-gated  $\text{Cl}^-$  channel on the HSNs. Our results identify discrete signals that entrain or  
 32 detach the circuit from the locomotion central pattern generator to produce active and inactive  
 33 states.

34

## 35 Introduction

36 Neural circuits are the functional units underlying all thoughts and behaviors, but there is  
 37 as yet no neural circuit in any organism for which we know with precision how the many  
 38 signaling events among its cells together generate its activity. This would require, among other  
 39 things, understanding how neuromodulators shape activity at chemical and electrical synapses  
 40 to alter the excitability of specific cells in the circuit to generate regulated, dynamic patterns of  
 41 circuit responses and a coherent behavioral output. One approach to this problem is to analyze  
 42 small neural circuits typical of invertebrate model organisms, so that both the simplicity of the  
 43 circuits and the powerful experimental approaches uniquely possible within these systems can  
 44 provide a penetrating analysis (Marder, 2012).

45 *C. elegans* egg-laying behavior is controlled by a small circuit that offers many  
 46 experimental advantages for study (Schafer, 2006). This circuit, diagrammed in Figure 1A,  
 47 consists of two serotonergic Hermaphrodite Specific Neurons (HSNs) and six cholinergic  
 48 Ventral C neurons (VCs), each of which synapse onto a set of vulval muscles whose  
 49 contraction expels eggs. Four neuroendocrine uv1 cells also regulate egg laying (Jose et al.,  
 50 2007). Despite its anatomical simplicity, the egg-laying circuit produces a regulated, rhythmic  
 51 behavior that alternates between quiescent periods of about 20 minutes during which no egg  
 52 laying occurs, and active states lasting a few minutes during which ~5 eggs are laid  
 53 (Waggoner et al., 1998). Active states appear to result when the HSNs release serotonin that  
 54 signals through G protein coupled receptors on the vulval muscles to increase their excitability  
 55 (Waggoner et al., 1998; Shyn et al., 2003; Hapiak et al., 2009; Emtage et al., 2012). Strong  
 56 regulation by sensory stimuli is superimposed on the pattern of alternating behavioral states.  
 57 For example, carbon dioxide regulates neuropeptide release from head sensory neurons that

signal through receptors on the HSNs to inhibit egg laying (Ringstad and Horvitz, 2008; Hallem et al., 2011). Worms also halt egg laying in the absence of food and restart the behavior when re-fed (Daniels et al., 2000; Dong et al., 2000).

*C. elegans* egg laying has been studied for decades, and dozens of genes have been identified by mutations that either reduce (Desai et al., 1988) or increase (Bany et al., 2003) egg laying. Some of the identified genes encode ion channels that regulate cell and synaptic electrical excitability (Elkes et al., 1997; Johnstone et al., 1997; Lee et al., 1997; Weinshenker et al., 1999; Jospin et al., 2002; Jose et al., 2007; Collins and Koelle, 2013). Other identified genes encode components of G protein signaling pathways that act in specific cells of the circuit (Brundage et al., 1996; Koelle and Horvitz, 1996; Hajdu-Cronin et al., 1999; Miller et al., 1999; Williams et al., 2007; Porter et al., 2010). These results suggest neuromodulators, including serotonin, signal through G proteins to regulate the excitability of specific cells in the circuit to control circuit activity and egg laying.

The ability to leverage egg-laying mutants to understand the molecular mechanisms that initiate, sustain, and terminate the active state of egg laying has been limited by the tools available to analyze activity in the cells of the egg-laying circuit.  $\text{Ca}^{2+}$  activity in cells in the circuit was initially optically recorded in immobilized animals, which have limited ability to engage in egg-laying behavior (Shyn et al., 2003; Zhang et al., 2008). More recently we developed methods to optically record  $\text{Ca}^{2+}$  activity of the vulval muscles in moving animals as they engage in normal egg-laying behavior. Using ratiometric imaging to correct for movement and focus artifacts, and recording at 20 frames/sec for periods of up to one hour, we were able to measure activity of the vulval muscles as animals cycled through active and inactive states (Collins and Koelle, 2013; Li et al., 2013). Our recordings showed that the vulval muscles are

excited rhythmically in phase with the body bends of animal locomotion, and we proposed this was due to signaling from the cholinergic motor neurons, including the VCs, that are rhythmically active during locomotion. We found that a conserved ERG K<sup>+</sup> channel depresses response of the vulval muscles to excitation, thus maintaining the inactive behavior state, and we proposed that serotonin signaling onto vulval muscle receptors enhances vulval muscle excitability to allow the strong muscle contractions and egg release seen in the active state. We have now generated tools to carry out Ca<sup>2+</sup> recordings in moving animals for each neuron type in the egg-laying circuit. Combining these recordings with precise manipulations of the circuit using mutations, optogenetics, and drugs allows us to deduce how specific signals from these cells drive specific features of circuit activity and behavior.

## Results

### Distinct patterns of activity in the egg-laying circuit accompany the active and inactive behavior states

We carried out long-term Ca<sup>2+</sup> recordings of HSN and VC neuron activity in behaving animals using methods we developed previously for the vulval muscles (Collins and Koelle, 2013). We generated transgenic strains of *C. elegans* co-expressing the fluorescent Ca<sup>2+</sup> reporter GCaMP5 and the Ca<sup>2+</sup>-independent fluorescent protein mCherry specifically in the HSN or VC neurons, and used ratiometric imaging to record cell activity and egg-laying behavior as animals moved through active and inactive egg-laying states (Figure 1). Because of the large size of the egg-laying synapse, we were able to clearly observe Ca<sup>2+</sup> transients localized to the presynaptic terminus in HSN (Figure 1B; Movie 1) and VC (Figure 1C; Movie 2).

For comparison, we also carried out  $\text{Ca}^{2+}$  recordings of vulval muscles, and as in our earlier studies of these muscles, were able to clearly distinguish the weak twitching contractions (Figure 1D; Movie 3) from the strong contractions that drove egg release (Figure 1E).

Through long-term  $\text{Ca}^{2+}$  imaging, we observed a striking increase in rhythmic activity in the cells of the circuit that began prior to the first egg-laying event and persisted beyond the last egg-laying event of each active state (Figure 1F). We defined the active state as one minute before the first egg-laying event and one minute after the last egg-laying event.

We found that HSNs displayed long (~4 seconds at half-maximum amplitude)  $\text{Ca}^{2+}$  transients that were largely consistent in waveform and amplitude, but that varied in occurring either as single events or trains (Figure 1F). There was also significant HSN activity outside of the active state, but HSN transients were more frequent during the active state (Figure 1G). Active state HSN transients typically occurred in bursts, within which HSN transients occurred every ~20 seconds (Figure 1G). Only 11% of HSN transients were accompanied by an egg release (Figure 1H), but almost every egg-laying event occurred during an HSN transient (Figure 1F; out of 49 total egg-laying events observed, 48 occurred within an HSN transient).

VC transients were shorter than HSN transients (~2 seconds at half-max) and variable in amplitude. We rarely observed VC transients during the inactive state, but we found a clear induction of transients during the active state (Movie 2; Figure 1F, G), and these transients occurred in bursts around egg-laying events with an inter-transient interval of ~10 seconds, about twice as frequent as seen for the HSNs. Although  $\text{Ca}^{2+}$  transients were most intense in the VC presynaptic varicosities and axonal processes, they were also visible in all six VC cell bodies, especially those of the VC4 and VC5 neurons that most closely flank the vulva (Figure 1C and Movie 2). Vulval muscle twitching and egg-laying contractions caused significant

mechanical deformation of the VC neurons. 34% of VC transients were accompanied by an egg release, a larger fraction than seen for HSN and vulval muscle  $\text{Ca}^{2+}$  transients (Figure 3H,  $p < 0.0001$ ; Fisher's exact test). Every egg-release event was accompanied by a VC transient. There was no correlation seen between the magnitudes of VC or HSN transients that did or did not coincide with egg release, while the magnitude of muscle  $\text{Ca}^{2+}$  transients that resulted in egg laying were ~4-fold larger than the muscle twitch transients that did not release eggs (Figure 1H).

The close apposition of HSN, VC, and vulval muscle synaptic regions prevented us from simultaneously imaging more than one cell type, but we were able to compare timing of activity in the different cells using the moment of egg release as an objective landmark. HSN  $\text{Ca}^{2+}$  transients peaked ~2 seconds prior to egg release (Figure 1I) and decayed slowly. Shorter VC  $\text{Ca}^{2+}$  transients followed HSN activity, peaking ~0.1 seconds before egg release. Vulval muscle  $\text{Ca}^{2+}$  transients peaked with egg laying. We also tracked vulval muscle contraction by measuring the size and fluorescence intensity of the mCherry labeled muscles, and saw that muscle relaxation and decay of vulval muscle  $\text{Ca}^{2+}$  immediately followed egg release (Figure 1I).

### **HSN, VC, and vulval muscle activity are phased with animal locomotion**

*C. elegans* moves with sinusoidal body bends consisting of waves of body-wall muscle contraction driven by the Ventral A and B (VA/VB) ventral nerve cord motor neurons. We previously observed that vulval muscle  $\text{Ca}^{2+}$  transients occurred rhythmically when the vulva was at a particular phase of the locomotion body bend (Collins and Koelle, 2013). Using our

video recordings of  $\text{Ca}^{2+}$  activity in moving animals, we examined whether HSN and VC activity are similarly phased with locomotion. Thus we determined timing of the peaks of HSN, VC, and vulval muscle  $\text{Ca}^{2+}$  transients relative to when the vulva passed through the previous and subsequent most contracted or relaxed state of a body bend. The results were plotted on circular histograms with ventral contraction at  $0/360^\circ$ , ventral relaxation at  $180^\circ$ , and intermediate phases of body bends at the angles in between (Figure 2A). We found that the HSN, VC, and vulval muscle  $\text{Ca}^{2+}$  transients occurred when the vulva was at particular phases of the locomotor body bend. HSN transients just prior to egg release reached their maximum at  $\sim 180^\circ$ , when the vulva and adjacent body wall muscles were at their most relaxed state (Figure 2B). VC and vulval muscle transients that accompanied egg laying occurred later, starting at  $\sim 225^\circ$  and  $270^\circ$ , respectively (Figure 2C and 2D). HSN transients that did not result in egg laying showed no clear evidence of phasing (Figure 2B). In contrast, VC transients and vulval muscle twitch transients that did not lead to egg release were still phased, but delayed by  $\sim 45^\circ$  toward the most ventral contracted state. These results confirm our previous observations that vulval muscle twitching and egg-laying activity are phased with locomotion (Collins and Koelle, 2013). These results extend that analysis to show that HSN, VC, and vulval muscle activity during egg laying events occur earlier in the body bend cycle, when the adjacent body wall muscles are in a more relaxed state.

## Optogenetic activation of HSNs initiates the egg-laying active state

To directly test how neurotransmitter signaling from the HSNs regulates egg-laying circuit activity, we used the *egl-6* promoter to express Channelrhodopsin-2 in the HSNs (Emtage et al., 2012), allowing us to drive neurotransmitter release specifically from the HSNs



with blue light. We repeated the observation of Emtage et al. (2012) that optogenetic activation of HSNs stimulates egg-laying behavior (Movie 4), but we activated the HSNs while simultaneously recording behavior and  $\text{Ca}^{2+}$  activity in the VCs (Figure 3A) or vulval muscles (Figure 3B). We found that activation of HSNs resulted in circuit activity reminiscent of a spontaneous active state, including rhythmic  $\text{Ca}^{2+}$  activity of both VCs and vulval muscles, and egg-laying events that accompanied a subset of these  $\text{Ca}^{2+}$  transients. Some differences from a spontaneous active state were notable. Almost every VC transient after optogenetic HSN activation was accompanied by an egg-laying event, whereas only one third of VC transients during spontaneous active states were accompanied by egg-laying events. These results suggest that the high level of HSN activity after optogenetic activation induces strong coupling of VC and vulval muscle excitation.

During both spontaneous and optogenetically-induced active states, rhythmic vulval muscle twitches occur far more frequently than do VC transients, suggesting these twitches are excited by something other than the VCs. Careful observation shows that the most dramatic  $\text{Ca}^{2+}$  changes during vulval muscle twitching occur at the ventral tips of the vm1 muscles (Figure 1D). The VCs innervate vm2 muscles but not the vm1 muscles. The vm1 muscles are instead innervated by the VB6 and VA7 neurons that also release acetylcholine to drive body wall muscle contraction for locomotion (White, J.G. et al., 1986). Consistent with this, vm1 twitching occurs at the same time the adjacent ventral body wall muscles are contracting during locomotion (Figure 2D). Increased electrical excitability of the vulval muscles during a spontaneous or optogenetically-induced active state may allow for vm1 excitation by VB6/VA7 with each body bend.

## 194 **VC neuron activity helps coordinate egg laying and locomotion**

195 Our observation that VC activity always accompanies egg release (Figure 1I and 3A) is  
 196 consistent with a proposal that the VCs release acetylcholine that signals through vulval muscle  
 197 nicotinic receptors to drive egg laying (Waggoner et al., 2000; Kim et al., 2001). While VC4 and VC5  
 198 make extensive synapses onto the vm2 muscles, VC1-3 and VC6 make extensive, distributed  
 199 synapses onto the ventral body wall muscles (White et al., 1976). How VC activity during egg  
 200 laying might affect body wall muscle contraction has not been examined. We optogenetically  
 201 activated the HSNs to induce active states and recorded animal speed around egg-laying  
 202 events (Figure 3C). We found a clear and significant reduction of locomotion speed beginning  
 203 ~1 s before egg release, a time when VC activity is increasing (Figure 1I). Locomotion speed  
 204 recovered immediately after egg release (Figure 3C). These results are consistent with the  
 205 hypothesis that acetylcholine released from the VCs slows locomotion during egg laying.

206 To test directly how VC activity regulates locomotion and egg laying, we used a *lin-11*  
 207 promoter fragment to express Channelrhodopsin-2 specifically in the VCs (Bany et al., 2003).  
 208 Optogenetic activation of the VCs was not sufficient to drive egg laying (Figure 3F), but did  
 209 lead to a rapid shortening of the body (Movie 5 and Figure 3D) and cessation of locomotion  
 210 (Figure 3E). The shortening phenotype seen in VC ChR2 animals after blue light exposure  
 211 closely resembles that seen for optogenetic activation of the body wall muscles (Nagel et al.,  
 212 2005), except the head and tail of VC-activated animals were still mobile and active, consistent  
 213 with the fact that VC neurons innervate only the central body wall muscles (White et al., 1976).  
 214 Our results indicate that while VC activity immediately precedes egg-laying events, it is not  
 215 sufficient to drive egg release. Optogenetic VC activation is sufficient to produce a slowing of  
 216 locomotion as seen during egg-laying events. In contrast, HSN activity is sufficient to induce all

of the hallmarks of the active state, including rhythmic vulval muscle twitching, VC transients, and the coordinated vulval muscle contractions that produce egg-laying events.

## **Animals lacking HSNs still enter the egg-laying active state**

We next tested whether HSN activity was necessary for circuit activity by recording vulval muscle activity in *egl-1(dm)* mutants, which lack HSN neurons (Trent et al., 1983). Animals lacking HSNs have a substantial lengthening of the inactive state (Waggoner et al., 1998) and are strongly egg-laying defective, accumulating ~50 eggs in the uterus rather than the 12-15 seen in the wild type (Trent et al., 1983). We expected to find that loss of HSNs led to a dramatic reduction in vulval muscle activity. Surprisingly, we found the opposite; animals lacking HSNs had more frequent vulval muscle  $\text{Ca}^{2+}$  transients during the inactive state and robust activity during infrequent active states that led to multiple eggs being laid in a short period (compare Figures 4A and 4B; quantitation in Figure 4C). There was a significant reduction in the amplitude of vulval muscle  $\text{Ca}^{2+}$  transients during egg laying in *egl-1(dm)* mutants while the amplitude of twitch  $\text{Ca}^{2+}$  transients was unaffected (Fig. 4D). Vulval muscle activity in *egl-1(dm)* mutants lacking HSNs resembled the frequent yet uncoordinated vulval muscle activity found in animals missing the vm2 vulval muscle arms onto which the HSNs normally make synapses (Li et al., 2013). Such activity involves asynchronous contraction of the anterior and posterior vulval muscles, which is ineffective at allowing egg release. One quantitative measure of this asynchrony is that overall vulval muscle  $\text{Ca}^{2+}$  transient peaks in *egl-1(dm)* mutants were longer in duration, likely resulting in individual muscle cells beginning their transients at different times (Figure 4E). Vulval muscle  $\text{Ca}^{2+}$  transients in animals lacking HSNs remained phased with locomotion, including the ~45° advance in phase of vulval muscle

activity that results in egg-laying events (compare Figures 4F and 4G). These results suggest that the HSNs are necessary to coordinate contraction of anterior and posterior vulval muscles, and that signals from other cells besides the HSNs can also induce the egg-laying active state.

We hypothesized that accumulating unlaid eggs could stretch the uterus or body, leading to signals responsible for the increased activity of the vulval muscles independent of neurotransmitter signaling from the HSNs. To test if egg accumulation contributed to the onset of the active phase, we sterilized animals with FUDR (Mitchell et al., 1979), a DNA synthesis inhibitor that blocks germ line cell division and thus egg production. FUDR-treated animals had a dramatic reduction of vulval muscle activity and appeared to be stuck in the inactive state, with no egg-laying transients observed (Figures 4A and 4B). The inhibition of vulval muscle activity by FUDR occurred in both wild-type animals and HSN-deficient *egl-1(dm)* mutants (Figures 4C and 4D). The residual vulval muscle  $\text{Ca}^{2+}$  twitch transients in FUDR-treated animals had phasing identical to those seen in the inactive state of untreated animals (Figures 4F and 4G). These results suggest that germ line activity and/or the accumulation of eggs in the uterus is required to initiate the egg-laying active state.

## **The uv1 neuroendocrine cells are mechanically deformed and activated by egg-laying events**

We previously identified a role for the uv1 neuroendocrine cells in inhibiting egg-laying behavior (Jose et al., 2007). The four uv1 cells sit at the junction between the uterine lumen and the vulval canal (Newman and Sternberg, 1996), and as such are positioned to mechanically sense the accumulation of unlaid eggs in the uterus and/or passage of eggs

through the vulval canal as they are laid. To record uv1  $\text{Ca}^{2+}$  activity, we co-expressed GCaMP5 and mCherry in uv1 from the *ocr-2* promoter and made recordings in behaving animals. We found that the uv1 cells were mechanically deformed as each egg passed through the vulva, and then showed strong  $\text{Ca}^{2+}$  transients after egg release (Figure 5A-B; Movie 5). Egg-laying events did not always trigger  $\text{Ca}^{2+}$  transients in uv1, with uv1-silent events usually being the first or last within an active state (data not shown). We also observed weaker uv1  $\text{Ca}^{2+}$  transients a few minutes before or after the egg-laying active state (Figure 5B-D). Because these were not closely associated with egg-laying events their functional importance remains unclear. Typical active state uv1  $\text{Ca}^{2+}$  transients began immediately with or slightly before egg release, coinciding with the initial mechanical deformation of uv1 caused by the egg, with the  $\text{Ca}^{2+}$  transient peak occurring ~2 seconds later (Figure 5E). Based on the position of the uv1 cells, their morphological deformations during passage of eggs, and the timing of uv1  $\text{Ca}^{2+}$  transients, our data suggest the uv1 cells are mechanically activated by eggs passing through the vulva during egg laying.

## **Tyramine signals through LGC-55 receptors to inhibit HSN activity and egg laying**

The uv1 cells make the biogenic amine neurotransmitter tyramine, and *tdc-1* mutations that disrupt tyramine biosynthesis lead to increased egg-laying behaviors (Alkema et al., 2005). We found that exogenous tyramine reduced egg laying in wild-type animals (Figure 6A). To identify targets of tyramine inhibition, we tested response to exogenous tyramine in strains mutant for three known *C. elegans* tyramine receptors. Animals lacking *lgc-55*, which encodes a tyramine-gated  $\text{Cl}^-$  channel, showed resistance to inhibition by exogenous tyramine (Figure 6A), although tyramine at high levels still had a residual ability to reduce egg laying in *lgc-55*

mutants (Figure 6B). We transformed into *C. elegans* a fosmid transgene containing the full-length *lgc-55* gene fused to GFP coding sequences, and found LGC-55 is expressed in the HSNs, uv1, and vulval muscles (Figure 6C and Pirri et al., 2009). Re-expression of LGC-55 specifically in HSN from the *tph-1* promoter restored tyramine sensitivity to *lgc-55* mutants (Figure 6D). We have previously shown that two Cl<sup>-</sup> extruding transporters, KCC-2 and ABTS-1, are expressed in the HSNs where they promote the development of inhibitory ligand-gated Cl<sup>-</sup> channel signaling (Tanis et al., 2009; Bellemer et al., 2011). These data suggest that tyramine signaling through LGC-55 would hyperpolarize the HSN and inhibit activity. To test this directly, we compared HSN activity in wild-type and *lgc-55* mutant animals. We observed a significant increase in the frequency of Ca<sup>2+</sup> transients in HSNs of *lgc-55* mutant animals (Figures 6E and 6F) in both the inactive and active states of egg-laying behavior. Mean HSN inter-transient intervals in wild-type animals were 41±5 seconds in the inactive state and 17±2 seconds during the active state, while intervals in *lgc-55* mutants were reduced to 22±2 seconds in the inactive state and 13±1 seconds during the active state. Thus, the absence of inhibitory feedback by tyramine signaling onto the HSNs leads to increased activity in both the active and inactive egg-laying behavior states.

## Discussion

Using a combination of optogenetic, molecular genetic, and Ca<sup>2+</sup> imaging approaches, we show an unexpected level of coordination of *C. elegans* egg-laying circuit activity by the rhythm of locomotion and by egg production. Using recordings of cell activity in behaving animals as they transition from the inactive to active egg-laying states, we were able to show that circuit activity is diminished during the inactive state, strongly increased and rhythmic

during the active state, and this rhythm is phased with sinusoidal locomotion. Sterilization eliminated the active state rhythm, locking animals in the inactive state. Our results suggest that activity in the egg-laying circuit, like that of many other modulated motor circuits, responds to rhythmic input from central pattern generators (Marder et al., 2015).

A working model shown in Figure 7 explains how different inputs into the egg-laying circuit are responsible for the inactive state and the active state rhythms observed during egg-laying behavior. Active state vulval muscle  $\text{Ca}^{2+}$  transients peak rhythmically each time the vulva approaches a ventral body bend, the point at which the cholinergic VB and VA motor neurons release acetylcholine to rhythmically excite both the vm1 muscles and adjacent ventral body wall muscles during locomotion. During the inactive state,  $\text{K}^+$  channels including ERG depress vulval muscle excitability below threshold, explaining why we fail to observe vulval muscle activity with each body bend during this state (Collins and Koelle, 2013). While we observe rhythmic activity in the HSNs in the active phase, the periodicity and phasing of HSN activity does not correlate with that of locomotion. Consistent with this, previous work found changes in osmolarity can drive rhythmic HSN activity even in immobilized animals (Zhang et al., 2008). Thus HSN rhythmic activity is independent of locomotion, although we found HSN  $\text{Ca}^{2+}$  transients that happen to fall at a specific phase of locomotor body bends are more likely to be followed by egg release. We propose that release of serotonin from the HSNs, along with an unknown signal resulting from mechanical stretch of the uterus by accumulating eggs, together raise vulval muscle electrical excitability to result in the active state during which the vulval muscles undergo rhythmic twitching or egg laying contractions in response to the same cholinergic VA and VB neurons that drive locomotor body bends. This model accounts for the phasing of vm1 transients with body bends, although egg-laying events require

additional activity in the vm2 muscles that results in the coordinated contraction of all vm muscles that results in egg release. We found that vm transients that lead to egg release are on average slightly phase advanced relative to those that do not. This phase advance could from the excitatory input onto the vm2 muscles occurring earlier in the body bend, and candidates for this input are the HSNs and VCs, both of which synapse onto the vm2 muscles and have phased activity during egg-laying events. The functional purpose of this phase advance may be mechanical. Passage of each  $25 \times 40 \mu\text{m}$  egg requires contraction of vm1 and vm2 muscles on both the anterior and posterior sides of the vulva (Li et al., 2013). There may not be sufficient room for vulva to fully open and release egg unless the adjacent body wall muscles are in a contracted state.

The HSNs are command neurons that integrate diverse sensory inputs and initiate the ~2 minute active state of the egg-laying circuit. Optogenetic activation of HSNs recapitulates features of the active state including phased VC and vulval muscle activity and multiple egg-laying events. However, stimulation of the HSNs fails to drive tetanic contraction of the vulval muscles as would be predicted for a motor neuron releasing a fast-acting neurotransmitter. Instead, HSN makes and releases the neuromodulator serotonin which signals through G protein coupled serotonin receptors to activate the vulval muscles (Desai et al., 1988; Shyn et al., 2003; Carnell et al., 2005; Hobson et al., 2006; Hapiak et al., 2009). The HSNs also release serotonin onto the AVF interneurons in the nerve ring to promote a state of locomotion arousal that accompanies the active state (Hardaker et al., 2001). Animals defective in serotonin signaling have reduced egg laying (Tanis et al., 2008), but this defect is not as severe as that of *egl-1(dm)* animals missing HSNs (Trent et al., 1983), suggesting HSN releases additional neurotransmitters. We found that optogenetic activation of HSNs leads to



rhythmic activity of VC neurons, which are not known to express serotonin receptors, so an unknown signal derived from HSN could directly activate VCs, as depicted in the Figure 7 model.

How is HSN activity controlled? The HSNs receive little synaptic input near the vulval except from the PLM mechanosensory neurons (White, J.G. et al., 1986). The PLMs inhibit HSN activity and egg laying in response to gentle touch (Zhang et al., 2008), but recent work indicates the PLM neurons are also deformed during normal patterns of locomotion that could contribute to rhythmic activity seen in HSN during egg laying (Topalidou et al., 2012). Neuroendocrine signaling also regulates HSN activity. *flp-10* and *flp-17* neuropeptides are released from the CO<sub>2</sub>-responsive BAG neurons in the head, and these neuropeptides signal through EGL-6 receptor and G $\alpha_o$  to activate IRK channels that inhibit HSN activity and egg laying (Ringstad and Horvitz, 2008; Hallem et al., 2011; Emtage et al., 2012). Because loss of EGL-6 or IRK channels do not increase egg laying as much as cell-specific inhibition of G $\alpha_o$ , there must be additional receptors and effectors of G $\alpha_o$  that inhibit HSN activity. G $\alpha_q$  signaling opposes G $\alpha_o$  to increase serotonin release from the HSNs (Tanis et al., 2008), but the ligands and receptors that activate G $\alpha_q$  have not yet been identified. Because we find that HSN Ca<sup>2+</sup> transients vary more in frequency than amplitude, we propose that these diverse sensory signals increase or reduce the probability that HSN reaches a threshold potential that can initiate, sustain, or terminate HSN activity and thus the active behavior state of the egg-laying circuit.

We have also identified an HSN-independent mechanism that induces the active state. Mutants lacking HSNs are strongly egg-laying defective, but eventually enter active states with properly phased vulval muscle twitching and egg-laying transients. The active state was

eliminated in animals sterilized by FUDR, reducing vulval muscle activity and phasing to that seen in the inactive state. Recent work has identified the gonad as an important site of regulation for adult-specific behaviors in *C. elegans* (Fujiwara et al., 2016). We propose that the accumulation of unlaid eggs in the uterus, perhaps leading to mechanical stretch, provides an essential, permissive signal for entry into the active state. Several steps during embryo production and maturation could regulate entry into the active state to result in the ~20 period of the egg-laying inactive state.. Animals grown on food generate one new oocyte from each of two gonad arms every ~10 minutes, balancing out the 3-5 eggs laid in the ~2 minute active state that occurs every ~20 minutes, to result in a ~constant number of unlaid eggs in the uterus (McCarter et al., 1999). New embryos are moved by gonadal sheath contractions into the spermatheca for fertilization and deposition into the uterus. Excitable cells drive each of these steps, providing potential sources of regulation by cell signaling and sensory feedback (Kariya et al., 2004). Eight uterine muscles line the uterine lumen and form gap junctions with the vm2 muscles (White, J.G. et al., 1986), and the addition of unlaid eggs into the uterus could induce a mechanical stretch that cross-excites the vm2 muscles. Future work will be required to understand how the accumulation of unlaid eggs promotes the active state.

Our results strongly imply that acetylcholine released from the VC motor neurons slows locomotion during vulval muscle contraction. We found that animal locomotion slows during egg release, and that optogenetic activation of the VC neurons halts movement and results in body wall muscle contraction and animal shortening. This function of the VCs is likely via acetylcholine signaling through nicotinic receptors expressed on ventral body wall muscles and neurons that regulate locomotion (White, J.G. et al., 1986; Nagel et al., 2005). The effect of VC activity to slow locomotion and contract body wall muscles may help compress the body and

uterus to encourage expulsion of eggs, analogous to the role of body wall muscle contraction in facilitating defecation (Liu and Thomas, 1994).

Our results provide more complex evidence as to whether VC acetylcholine also directly triggers egg release. We found that VC activity always accompanies egg-laying contractions of the vulval muscles. The vulval muscles also express nicotinic acetylcholine receptors, and receptor agonists including levamisole and nicotine stimulate egg laying (Weinshenker et al., 1995; Waggoner et al., 2000). However, we found little correlation between the strength of the VC activity and whether an egg is laid (Figure 1H), and that optogenetic activation of the VC neurons fails to drive egg laying. Further, VC-defective and acetylcholine-deficient mutants have *increased* egg-laying behavior (Bany et al., 2003; Ringstad and Horvitz, 2008). These data together are consistent with a model in which acetylcholine released from the VA/VB motor neurons signal through nicotinic receptors on the vm1 muscles to stimulate rhythmic vulval muscle twitching, which combined with acetylcholine released from the VC neurons to similarly excite the vm2 muscles results in egg laying. High levels of VC activity, such as occurs during optogenetic activation, may drive release of additional signals, such as neuropeptides, that inhibit egg-laying circuit activity (Bany et al., 2003; Banerjee et al., 2016), or by freezing locomotion may feedback to halt the VA/VB activity required to drive vm1 contraction.

How is VC activity controlled? The VC neurons are unusual in that they are largely presynaptic, only receiving input from each other and the HSNs. As noted above, optogenetic activation of HSNs results in VC activity, suggesting a currently unknown signal from HSN directly activates VCs. A second possible input onto VCs is suggested by the fact that the VC neurons extend processes devoid of synapses dorsally along the vulval hypodermis that could

be mechanosensory (White, J.G. et al., 1986). Thus, rhythmic VC activity could be stimulated mechanically by body bends or by a humoral signal released from the locomotor circuit (Hu et al., 2011). Further, VC activity could be mechanically stimulated by vulval muscle contraction (Zhang et al., 2010), particularly as we observed mechanical deformation of VC presynaptic termini during strong twitching and egg-laying contractions. In this way, the VCs could act like baroreceptors—mechanically activated by vulval muscle contraction to drive contraction of the body wall muscles that results in animal slowing until the feedback of egg release. In this model, the coordination of locomotion and egg laying by tying both behaviors to the same central pattern generator allows productive egg release.

The uv1 neuroendocrine cells inform the circuit that eggs have been successfully laid. Passage of eggs through the vulva mechanically deforms the uv1 cells and triggers a strong  $\text{Ca}^{2+}$  transient. Our results suggest this activates uv1 to release tyramine that inhibits egg-laying, at least in part via the LGC-55 receptor on the HSN neurons. Active states last ~2 minutes, and inhibitory tyramine release from uv1 could provide a feedback signal that terminates activity in the circuit. The four uv1 cells have a unique structural position in the vulva that may explain how they become activated during egg laying (Newman et al., 1996). uv1 cells extend processes that contact and make adherens junctions with the ventral vulF vulval cells. uv1 cells also makes dorsal attachments to utse, a large, H-shaped multinucleate uterine seam cell that attaches the uterus to the lateral epidermis and that functions as a hymen broken by the first egg-laying event. The acute mechanical strain on vulF, uv1, and/or utse during egg passage could mechanically activate ion channels. Previous work has shown uv1 expresses several TRPV channels that may be mechanosensory and contribute to this response (Jose et al., 2007). A dominant-negative OCR-2 mutant expressed in uv1 leads to

hyperactive egg-laying behavior phenotype. We still observe  $\text{Ca}^{2+}$  transients in uv1 after egg-laying events in this *ocr-2(vs29)* mutant (data not shown), suggesting other channels contribute to the uv1 activity we see after egg laying. Although our results indicate that uv1 releases tyramine to inhibit the HSNs via LGC-55, this signaling event does not fully explain the ability of uv1 cells to inhibit the egg-laying circuit. We found that inhibition of egg laying by exogenous tyramine is reduced but not eliminated in *lgc-55* null mutants, suggesting other tyramine receptors help terminate the active state. The uv1 cells also make *nlp-7* and *flp-11*, two neuropeptides that inhibit HSN activity and egg-laying behavior (Banerjee et al., submitted), and the identification of the receptors and signaling pathways through which they inhibit serotonin release will help to more fully understand how activity of the egg-laying circuit is terminated.

Every neural circuit may require specific signals to initiate activity when its function is required, signals to coordinate the dynamic activity of its various cells, and mechanisms to determine when the circuit has successfully completed its task and signal to turn off activity. Many circuits also must respond to specific signals from central pattern generators that coordinate the activity of multiple circuits. A great challenge is to reduce these abstract concepts to concrete, specific mechanisms in the case of a real circuit. For the *C. elegans* egg-laying circuit, signals in each of the categories outlined above are now identified, albeit in varying levels of detail and completeness. Continuing analysis of the *C. elegans* egg-laying circuit using recordings of  $\text{Ca}^{2+}$  activity in behaving animals, combined with genetic, optogenetic, and pharmacological manipulation, provides a path towards detailed understanding the mechanisms that control activity of this model circuit.

## 469 **Materials and Methods**

### 470 Nematode Culture, Strains, and Maintenance

471 *Caenorhabditis elegans* strains were maintained as hermaphrodites at 20°C on Nematode  
 472 Growth Medium (NGM) agar plates with *E. coli* OP50 as a source of food as described  
 473 (Brenner, 1974). All strains are derived from the Bristol N2 wild-type strain, and all assays  
 474 were performed using age-matched adult hermaphrodites ~24 hours past the late L4 stage.  
 475 Animals were treated with 0.1 mg/ml floxuridine (FUDR) at a late L4 stage when all non-  
 476 germline cell divisions are complete. A list of strains, mutants, and transgenes used in this  
 477 study can be found in Table 1.

### 478 Molecular Biology and Transgenes

479 *Vulval muscles*: GCaMP5G (Akerboom et al., 2012) and mCherry were expressed in the  
 480 vulval muscles from the *unc-103e* promoter as previously described (Collins and Koelle, 2013).  
 481 Briefly, pKMC274 (GCaMP5, 20ng/μl) and pKMC257 (mCherry, 2ng/μl) were co-injected along  
 482 with the pL15EK *lin-15* rescue plasmid (50ng/μl) into LX1832 *lite-1(ce314)*, *lin-15(n765ts)* X  
 483 animals. The GCaMP5/mCherry extrachromosomal transgene produced was chromosomally  
 484 integrated using UV/TMP mutagenesis, creating the integrated transgene *vsIs164*, and the  
 485 resulting transgenic animals were backcrossed to the LX1832 parental line six times.

486 *HSN*: GCaMP5G and mCherry were expressed in the HSN motor neurons using the *nlp-3*  
 487 promoter. mCherry and GCaMP5G coding sequences were ligated into pJB9 bearing the *nlp-3*  
 488 promoter and *nlp-3* 3' untranslated region, and the resulting plasmids (GCaMP5, pKMC300,  
 489 80ng/μl; mCherry, pKMC299, 20ng/μl) were co-injected with pL15EK (50ng/μl) into LX1832  
 490 worms. The extrachromosomal transgene produced was integrated with UV/TMP, creating the

integrated transgene *vs/s183*, and the resulting transgenic animals were backcrossed to the LX1832 parental line six times. The *wz/s30* transgene expressing Channelrhodopsin-2 from the *egl-6* promoter has been described (Emtage et al., 2012).

**VC:** GCaMP5G and mCherry were expressed in the VC motor neurons using pKMC145, a pDM4-based plasmid bearing a *lin-11* enhancer region fused to the *pes-10* basal promoter with a modified multiple cloning site (Bany et al., 2003; Tanis et al., 2008). Derivatives expressing GCaMP5 (pKMC273, 80ng/μl) and mCherry (pKMC275, 30ng/μl) were co-injected with pL15EK (50ng/μl) into LX1832 worms. The extrachromosomal transgene produced was integrated with UV/TMP, creating the transgene *vs/s172*, and transgenic animals were backcrossed to the LX1832 parental line six times. To activate the VCs optogenetically, coding sequences for ChR2-YFP bearing the H134R, T159C mutations (Erbguth et al., 2012) were amplified by PCR, ligated into pKMC145 to generate pKMC283, injected at 80ng/μl into LX1832 along with pL15EK at 50ng/μl. The extrachromosomal transgene produced was integrated with UV/TMP creating the transgene *key/s3*, and the resulting animals were backcrossed to LX1832 parental line six times.

**uv1:** GCaMP5G and mCherry were expressed in uv1 using the *ocr-2* promoter. GCaMP5 and mCherry coding sequences were ligated into pJT79 between the *ocr-2* promoter and 3' untranslated region (Jose et al., 2007) to generate plasmids pKMC281 and pKMC284, respectively. Long-range PCR products amplified from these plasmids were injected into worms at 80ng/μl each along with pL15EK (50ng/μl) as previously described (Jose et al., 2007). The extrachromosomal transgene produced was integrated with UV/TMP creating the transgene *vs/s177*, and the resulting animals were backcrossed to the LX1832 parental line six times.

514 *lgc-55*: A ~40 kb genomic fosmid clone (WRM063D\_A12; Perkins, 2011) recombineered to  
 515 express LGC-55 tagged with GFP at the C-terminus (Sarov et al., 2012) was injected at  
 516 100ng/ $\mu$ l into LX2081 *unc-119(ed3)* mutant animals expressing TagRFP pan-neuronally to  
 517 generate the strain LX2126. These animals were then crossed with LX2096 animals to  
 518 exchange pan-neural mCherry transgene for one that expresses in the vulval muscles,  
 519 generating LX2126. Fluorescence was visualized on immobilized animals with a 63x water  
 520 objective on a Zeiss LSM 710 Duo confocal microscope. For cell-specific rescue, LGC-55 was  
 521 expressed in the HSN neurons of *lgc-55* mutant animals using the *tph-1* promoter. Briefly, a  
 522 *lgc-55* cDNA (Pirri et al., 2009) was inserted into pJM66A plasmid (Moresco and Koelle, 2004)  
 523 to generate pJT105. pJT105, or a GFP-expressing control plasmid (pJM60A), was injected at  
 524 100ng/ $\mu$ l along with pL15EK rescue plasmid (50ng/ $\mu$ l) into *lgc-55(tm2913); lin-15(n765ts)*  
 525 double mutant animals. Egg-laying behavior was analyzed in five independent transgenic lines  
 526 expressing LGC-55 or GFP, and one strain each were kept for long-term storage.

## 527 Ratiometric Ca<sup>2+</sup> Imaging

528 Animals were mounted between glass coverslips and chunked sections of NGM plates for  
 529 imaging as described (Collins and Koelle, 2013; Li et al., 2013). The stage and focus were  
 530 adjusted manually to keep the egg-laying system in view during recording periods. Three  
 531 different imaging systems were used to collect recordings, and each gave quantitatively similar  
 532 results. First, single, two-channel confocal slices (18  $\mu$ m thick) of GCaMP5 and mCherry  
 533 fluorescence were collected through a 20x Plan Apochromat objective (0.8NA) using a Zeiss  
 534 Axio Observer microscope and recorded at 20 fps at 256x256 pixel resolution, 16-bit depth  
 535 using a 710 Duo LIVE scanner as described previously (Collins and Koelle, 2013; Li et al.,  
 536 2013). Second, widefield GCaMP5 and mCherry fluorescence was imaged through a 20x Plan



537 Apochromat objective (0.8NA) using a Zeiss Axio Observer microscope, and the GCaMP5 and  
 538 mCherry fluorescence was separated using a W-View Gemini image splitter at 20 fps at  
 539 256x256 pixel resolution, 16-bit depth onto a single, 4x4 binned Hamamatsu ORCA Flash 4.0  
 540 V2 sCMOS sensor after excitation with 470 nm and 590 nm LEDs (Zeiss Colibri.2). Third,  
 541 single, two-channel confocal slices (20  $\mu$ m thick) of GCaMP5 and mCherry fluorescence were  
 542 collected using an inverted Leica TCS SP5 confocal microscope with the resonant scanner  
 543 running at 8,000Hz and collected at 20 fps at 256x256 pixel resolution, 12-bit depth after 2x  
 544 digital zoom.

545 Quantitative ratiometric analysis was performed after importing image sequences into  
 546 Volocity (Perkin Elmer). GCaMP5/mCherry ratios were calculated, and pixels with mCherry  
 547 fluorescence intensities  $\sim$ 2 standard deviations above background were selected as objects for  
 548 mean ratio measurement. While the Volocity algorithm set with these parameters typically  
 549 identified the vulval muscles and uv1 cells as a single object, the complex morphology of the  
 550 HSN and VC neurons often led to the cells being found as two or more objects within each  
 551 video frame. These were rejoined using a custom script in MATLAB (Mathworks). The ratio of  
 552 the joined object was scaled in proportion to the area of each component object to generate an  
 553 area-adjusted GCaMP5/mCherry ratio. The ratio data were then smoothed using a 150 msec  
 554 (three timepoint) rolling average, and the lowest 10% of the GCaMP5/mCherry ratio values  
 555 over the entire recording period were averaged to establish a  $\Delta R/R$  baseline.  $Ca^{2+}$  transients  
 556 and their features (peak amplitude and width at half-maximum) were identified from ratio traces  
 557 using the *findpeaks* algorithm in MATLAB, and peaks were confirmed by visual inspection of  
 558 GCaMP5/mCherry recordings and ratio traces. Egg-laying events were observed by allowing a  
 559 small amount of bright field light to transmit into the mCherry channel whose gain was

increased for egg visualization. The egg-laying active state was defined in recordings to include those transients that occurred one minute before and one minute after each egg-laying event. Those transients not found within an active state were considered to be in the inactive state. To facilitate comparisons of  $\Delta R/R$  between different reporters and recording conditions (Figure 1H and 5D), the maximum peak amplitude was normalized to 1. For phasing analysis, the timing of individual  $Ca^{2+}$  transient peaks relative to ventral relaxation and contraction was determined independent of whether the animal was engaged in forward or reverse locomotion, as described previously (Collins and Koelle, 2013).

## Optogenetics

Channelrhodopsin-2 (ChR2) expressing strains were grown in the presence or absence of the ChR2 cofactor all-*trans* retinal (ATR). ATR was prepared at 100mM in 100% ethanol and stored at -20°C. To prepare NGM plates for behavior analysis, ATR was diluted to 0.4 mM with warmed cultures of OP50 bacteria in B Broth, and 200  $\mu$ l of culture was seeded onto each 60 mm NGM plate. The plates were allowed to grow for 24 hours at 25-37°C, after which late L4 worms were staged onto prepared plates for behavioral assays 24 hours later. During  $Ca^{2+}$  imaging experiments, ChR2 was activated with the same light used for GCaMP5 excitation. For timed behavior recording experiments on plates, a OTPG\_4 TTL Pulse Generator (Doric Optics) was used to trigger image capture (Grasshopper 3, 4.1 Megapixel, USB3 CMOS camera, Point Grey Research) and shutter opening on a EL6000 metal halide light source generating 8-16 mW/cm<sup>2</sup> (depending on the magnification used) of  $\sim 470 \pm 20$ nm blue light via a EGFP filter set mounted on a Leica M165FC stereomicroscope. Worm size, speed, and body bends were determined from image sequences using Volocity.

## Tyramine behavior assays

583 Three adult animals were placed onto each of three 35 mm agar plates prepared with  
584 tyramine-HCl (Sigma) and acetic acid seeded with OP50 bacteria as described (Pirri et al.,  
585 2009). The average number of eggs laid was counted after 30 minutes from at least 11 trials  
586 for each genotype and tyramine concentration.

## 587 Statistical analyses

588 Data were analyzed using Prism 6 (GraphPad). Average worm speed, worm length, body  
589 bends, or eggs laid were compared using one-way ANOVA with Bonferroni correction for  
590 multiple comparisons, and error bars indicate 95% confidence intervals for the mean.  $\text{Ca}^{2+}$   
591 transient peak amplitudes, widths, and inter-transient intervals were pooled from multiple  
592 animals ( $n \geq 5$  animals per experiment), compared using the Mann-Whitney test (for pair-wise  
593 comparisons) or the Kruskal-Wallis test with Dunn's correction (for multiple comparisons), and  
594 error bars indicate quartile intervals for the indicated median.  $p < 0.05$  interactions were deemed  
595 significant and are labeled with an asterisk.

596

## 597 **Acknowledgments**

598 This work was funded by a postdoctoral fellowship from the American Heart Association to  
 599 KMC (POST4990016) and by grants from the NINDS to MRK (NS036918) and to MRK and  
 600 KMC (NS086932). Confocal instrumentation was supported by a grant to the Yale Liver Center  
 601 (DK34989). Some strains were provided by the *C. elegans* Genetics Center, which is funded  
 602 by NIH Office of Research Infrastructure Programs (P40 OD010440). We thank members of  
 603 the Koelle and Collins labs, and Drs. James Baker, Julia Dallman, and Mason Klein for  
 604 comments and helpful discussions on the manuscript.

605

## 606 **Competing Interests**

607 The authors declare no financial and non-financial competing interests.

608

## 609 **References**

- 610 Akerboom J et al. (2012) Optimization of a GCaMP calcium indicator for neural activity imaging.  
611 J Neurosci Off J Soc Neurosci 32:13819–13840.
- 612 Alkema MJ, Hunter-Ensor M, Ringstad N, Horvitz HR (2005) Tyramine Functions  
613 independently of octopamine in the *Caenorhabditis elegans* nervous system. *Neuron*  
614 46:247–260.
- 615 Bany IA, Dong M-Q, Koelle MR (2003) Genetic and cellular basis for acetylcholine inhibition of  
616 *Caenorhabditis elegans* egg-laying behavior. *J Neurosci Off J Soc Neurosci* 23:8060–  
617 8069.
- 618 Bellemer A, Hirata T, Romero MF, Koelle MR (2011) Two types of chloride transporters are  
619 required for GABA(A) receptor-mediated inhibition in *C. elegans*. *EMBO J* 30:1852–  
620 1863.
- 621 Brenner S (1974) The genetics of *Caenorhabditis elegans*. *Genetics* 77:71–94.
- 622 Brundage L, Avery L, Katz A, Kim UJ, Mendel JE, Sternberg PW, Simon MI (1996) Mutations  
623 in a *C. elegans* Gqalpha gene disrupt movement, egg laying, and viability. *Neuron*  
624 16:999–1009.
- 625 Carnell L, Illi J, Hong SW, McIntire SL (2005) The G-protein-coupled serotonin receptor SER-1  
626 regulates egg laying and male mating behaviors in *Caenorhabditis elegans*. *J Neurosci*  
627 Off J Soc Neurosci 25:10671–10681.
- 628 Collins KM, Koelle MR (2013) Postsynaptic ERG Potassium Channels Limit Muscle Excitability  
629 to Allow Distinct Egg-Laying Behavior States in *Caenorhabditis elegans*. *J Neurosci Off*  
630 *J Soc Neurosci* 33:761–775.
- 631 Daniels SA, Ailion M, Thomas JH, Sengupta P (2000) *egl-4* acts through a transforming growth  
632 factor-beta/SMAD pathway in *Caenorhabditis elegans* to regulate multiple neuronal  
633 circuits in response to sensory cues. *Genetics* 156:123–141.
- 634 Desai C, Garriga G, McIntire SL, Horvitz HR (1988) A genetic pathway for the development of  
635 the *Caenorhabditis elegans* HSN motor neurons. *Nature* 336:638–646.
- 636 Dong MQ, Chase D, Patikoglou GA, Koelle MR (2000) Multiple RGS proteins alter neural G  
637 protein signaling to allow *C. elegans* to rapidly change behavior when fed. *Genes Dev*  
638 14:2003–2014.
- 639 Elkes DA, Cardozo DL, Madison J, Kaplan JM (1997) EGL-36 Shaw channels regulate *C.*  
640 *elegans* egg-laying muscle activity. *Neuron* 19:165–174.
- 641 Emtage L, Aziz-Zaman S, Padovan-Merhar O, Horvitz HR, Fang-Yen C, Ringstad N (2012)  
642 IRK-1 Potassium Channels Mediate Peptidergic Inhibition of *Caenorhabditis elegans*  
643 Serotonin Neurons via a Go Signaling Pathway. *J Neurosci Off J Soc Neurosci*  
644 32:16285–16295.

- 645 Erbguth K, Prigge M, Schneider F, Hegemann P, Gottschalk A (2012) Bimodal activation of  
646 different neuron classes with the spectrally red-shifted channelrhodopsin chimera C1V1  
647 in *Caenorhabditis elegans*. *PloS One* 7:e46827.
- 648 Fujiwara M, Aoyama I, Hino T, Teramoto T, Ishihara T (2016) Gonadal Maturation Changes  
649 Chemotaxis Behavior and Neural Processing in the Olfactory Circuit of *Caenorhabditis*  
650 *elegans*. *Curr Biol CB* 26:1522–1531.
- 651 Hajdu-Cronin YM, Chen WJ, Patikoglou G, Koelle MR, Sternberg PW (1999) Antagonism  
652 between G(o)alpha and G(q)alpha in *Caenorhabditis elegans*: the RGS protein EAT-16  
653 is necessary for G(o)alpha signaling and regulates G(q)alpha activity. *Genes Dev*  
654 13:1780–1793.
- 655 Hallem EA, Spencer WC, McWhirter RD, Zeller G, Henz SR, Räscht G, Miller DM, Horvitz HR,  
656 Sternberg PW, Ringstad N (2011) Receptor-type guanylate cyclase is required for  
657 carbon dioxide sensation by *Caenorhabditis elegans*. *Proc Natl Acad Sci U S A*  
658 108:254–259.
- 659 Hapiak VM, Hobson RJ, Hughes L, Smith K, Harris G, Condon C, Komuniecki P, Komuniecki  
660 RW (2009) Dual excitatory and inhibitory serotonergic inputs modulate egg laying in  
661 *Caenorhabditis elegans*. *Genetics* 181:153–163.
- 662 Hardaker LA, Singer E, Kerr R, Zhou G, Schafer WR (2001) Serotonin modulates locomotory  
663 behavior and coordinates egg-laying and movement in *Caenorhabditis elegans*. *J*  
664 *Neurobiol* 49:303–313.
- 665 Hobson RJ, Hapiak VM, Xiao H, Buehrer KL, Komuniecki PR, Komuniecki RW (2006) SER-7,  
666 a *Caenorhabditis elegans* 5-HT7-like receptor, is essential for the 5-HT stimulation of  
667 pharyngeal pumping and egg laying. *Genetics* 172:159–169.
- 668 Hu Z, Pym ECG, Babu K, Vashlishan Murray AB, Kaplan JM (2011) A neuropeptide-mediated  
669 stretch response links muscle contraction to changes in neurotransmitter release.  
670 *Neuron* 71:92–102.
- 671 Johnstone DB, Wei A, Butler A, Salkoff L, Thomas JH (1997) Behavioral defects in *C. elegans*  
672 *egl-36* mutants result from potassium channels shifted in voltage-dependence of  
673 activation. *Neuron* 19:151–164.
- 674 Jose AM, Bany IA, Chase DL, Koelle MR (2007) A specific subset of transient receptor  
675 potential vanilloid-type channel subunits in *Caenorhabditis elegans* endocrine cells  
676 function as mixed heteromers to promote neurotransmitter release. *Genetics* 175:93–  
677 105.
- 678 Jospin M, Jacquemond V, Mariol M-C, Segalat L, Allard B (2002) The L-type voltage-  
679 dependent Ca<sup>2+</sup> channel EGL-19 controls body wall muscle function in *Caenorhabditis*  
680 *elegans*. *J Cell Biol* 159:337–348.
- 681 Kariya K-I, Bui YK, Gao X, Sternberg PW, Kataoka T (2004) Phospholipase Cepsilon regulates  
682 ovulation in *Caenorhabditis elegans*. *Dev Biol* 274:201–210.

- 683 Kim J, Poole DS, Waggoner LE, Kempf A, Ramirez DS, Treschow PA, Schafer WR (2001)  
684 Genes affecting the activity of nicotinic receptors involved in *Caenorhabditis elegans*  
685 egg-laying behavior. *Genetics* 157:1599–1610.
- 686 Koelle MR, Horvitz HR (1996) EGL-10 regulates G protein signaling in the *C. elegans* nervous  
687 system and shares a conserved domain with many mammalian proteins. *Cell* 84:115–  
688 125.
- 689 Lee RY, Lobel L, Hengartner M, Horvitz HR, Avery L (1997) Mutations in the alpha1 subunit of  
690 an L-type voltage-activated Ca<sup>2+</sup> channel cause myotonia in *Caenorhabditis elegans*.  
691 *EMBO J* 16:6066–6076.
- 692 Li P, Collins KM, Koelle MR, Shen K (2013) LIN-12/Notch signaling instructs postsynaptic  
693 muscle arm development by regulating UNC-40/DCC and MADD-2 in *Caenorhabditis*  
694 *elegans*. *eLife* 2:e00378.
- 695 Liu DW, Thomas JH (1994) Regulation of a periodic motor program in *C. elegans*. *J Neurosci*  
696 *Off J Soc Neurosci* 14:1953–1962.
- 697 Marder E (2012) Neuromodulation of neuronal circuits: back to the future. *Neuron* 76:1–11.
- 698 Marder E, Goeritz ML, Otopalik AG (2015) Robust circuit rhythms in small circuits arise from  
699 variable circuit components and mechanisms. *Curr Opin Neurobiol* 31:156–163.
- 700 McCarter J, Bartlett B, Dang T, Schedl T (1999) On the control of oocyte meiotic maturation  
701 and ovulation in *Caenorhabditis elegans*. *Dev Biol* 205:111–128.
- 702 Miller KG, Emerson MD, Rand JB (1999) Gα and diacylglycerol kinase negatively  
703 regulate the Gα pathway in *C. elegans*. *Neuron* 24:323–333.
- 704 Mitchell DH, Stiles JW, Santelli J, Sanadi DR (1979) Synchronous growth and aging of  
705 *Caenorhabditis elegans* in the presence of fluorodeoxyuridine. *J Gerontol* 34:28–36.
- 706 Moresco JJ, Koelle MR (2004) Activation of EGL-47, a Gα(o)-coupled receptor, inhibits  
707 function of hermaphrodite-specific motor neurons to regulate *Caenorhabditis elegans*  
708 egg-laying behavior. *J Neurosci Off J Soc Neurosci* 24:8522–8530.
- 709 Nagel G, Brauner M, Liewald JF, Adeishvili N, Bamberg E, Gottschalk A (2005) Light activation  
710 of channelrhodopsin-2 in excitable cells of *Caenorhabditis elegans* triggers rapid  
711 behavioral responses. *Curr Biol CB* 15:2279–2284.
- 712 Newman AP, Sternberg PW (1996) Coordinated morphogenesis of epithelia during  
713 development of the *Caenorhabditis elegans* uterine-vulval connection. *Proc Natl Acad*  
714 *Sci* 93:9329–9333.
- 715 Newman AP, White JG, Sternberg PW (1996) Morphogenesis of the *C. elegans* hermaphrodite  
716 uterus. *Dev Camb Engl* 122:3617–3626.



- 717 Perkins, Jaryn Daniel (2011) Comparison of fosmid libraries made from two geographic  
718 isolates of *Caenorhabditis elegans*. Available at: <http://dx.doi.org/10.14288/1.0071587>  
719 [Accessed August 6, 2016].
- 720 Pirri JK, McPherson AD, Donnelly JL, Francis MM, Alkema MJ (2009) A tyramine-gated  
721 chloride channel coordinates distinct motor programs of a *Caenorhabditis elegans*  
722 escape response. *Neuron* 62:526–538.
- 723 Porter MY, Xie K, Pozharski E, Koelle MR, Martemyanov KA (2010) A Conserved Protein  
724 Interaction Interface on the Type 5 G Protein  $\beta$  Subunit Controls Proteolytic Stability and  
725 Activity of R7 Family Regulator of G Protein Signaling Proteins. *J Biol Chem*  
726 285:41100–41112.
- 727 Ringstad N, Horvitz HR (2008) FMRFamide neuropeptides and acetylcholine synergistically  
728 inhibit egg-laying by *C. elegans*. *Nat Neurosci* 11:1168–1176.
- 729 Sarov M et al. (2012) A genome-scale resource for in vivo tag-based protein function  
730 exploration in *C. elegans*. *Cell* 150:855–866.
- 731 Schafer WF (2006) Genetics of egg-laying in worms. *Annu Rev Genet* 40:487–509.
- 732 Shyn SI, Kerr R, Schafer WR (2003) Serotonin and Go modulate functional states of neurons  
733 and muscles controlling *C. elegans* egg-laying behavior. *Curr Biol CB* 13:1910–1915.
- 734 Tanis JE, Bellemer A, Moresco JJ, Forbush B, Koelle MR (2009) The potassium chloride  
735 cotransporter KCC-2 coordinates development of inhibitory neurotransmission and  
736 synapse structure in *Caenorhabditis elegans*. *J Neurosci Off J Soc Neurosci* 29:9943–  
737 9954.
- 738 Tanis JE, Moresco JJ, Lindquist RA, Koelle MR (2008) Regulation of serotonin biosynthesis by  
739 the G proteins Galphao and Galphaq controls serotonin signaling in *Caenorhabditis*  
740 *elegans*. *Genetics* 178:157–169.
- 741 Topalidou I, Keller C, Kalebic N, Nguyen KCQ, Somhegyi H, Politi KA, Heppenstall P, Hall DH,  
742 Chalfie M (2012) Genetically separable functions of the MEC-17 tubulin  
743 acetyltransferase affect microtubule organization. *Curr Biol CB* 22:1057–1065.
- 744 Trent C, Tsuing N, Horvitz HR (1983) Egg-laying defective mutants of the nematode  
745 *Caenorhabditis elegans*. *Genetics* 104:619–647.
- 746 Waggoner LE, Dickinson KA, Poole DS, Tabuse Y, Miwa J, Schafer WR (2000) Long-term  
747 nicotine adaptation in *Caenorhabditis elegans* involves PKC-dependent changes in  
748 nicotinic receptor abundance. *J Neurosci Off J Soc Neurosci* 20:8802–8811.
- 749 Waggoner LE, Zhou GT, Schafer RW, Schafer WR (1998) Control of alternative behavioral  
750 states by serotonin in *Caenorhabditis elegans*. *Neuron* 21:203–214.



751 Weinshenker D, Garriga G, Thomas JH (1995) Genetic and pharmacological analysis of  
752 neurotransmitters controlling egg laying in *C. elegans*. *J Neurosci Off J Soc Neurosci*  
753 15:6975–6985.

754 Weinshenker D, Wei A, Salkoff L, Thomas JH (1999) Block of an ether-a-go-go-like K(+)   
755 channel by imipramine rescues *egl-2* excitation defects in *Caenorhabditis elegans*. *J*  
756 *Neurosci Off J Soc Neurosci* 19:9831–9840.

757 White JG, Southgate E, Thomson JN, Brenner S (1976) The structure of the ventral nerve cord  
758 of *Caenorhabditis elegans*. *Philos Trans R Soc Lond B Biol Sci* 275:327–348.

759 White, J.G., Southgate, E., Thomson, J.N., Brenner, S. (1986) The structure of the nervous  
760 system of the nematode *Caenorhabditis elegans*. *Phil Trans R Soc* 314:1–340.

761 Williams SL, Lutz S, Charlie NK, Vettel C, Ailion M, Coco C, Tesmer JJG, Jorgensen EM,  
762 Wieland T, Miller KG (2007) Trio's Rho-specific GEF domain is the missing Galpha q  
763 effector in *C. elegans*. *Genes Dev* 21:2731–2746.

764 Zhang M, Chung SH, Fang-Yen C, Craig C, Kerr RA, Suzuki H, Samuel ADT, Mazur E,  
765 Schafer WR (2008) A self-regulating feed-forward circuit controlling *C. elegans* egg-  
766 laying behavior. *Curr Biol CB* 18:1445–1455.

767 Zhang M, Schafer WR, Breitling R (2010) A circuit model of the temporal pattern generator of  
768 *Caenorhabditis elegans* egg-laying behavior. *BMC Syst Biol* 4:81.

769

770

771 **Table 1: Strains used in this study**

| Strain         | Feature                                                                  | Genotype                                                                 | Figures |
|----------------|--------------------------------------------------------------------------|--------------------------------------------------------------------------|---------|
| <b>LX1832</b>  | Strain for transgene production                                          | <i>lite-1(ce314) lin-15(n765ts) X</i>                                    | 1-6     |
| <b>LX1836</b>  | HSN Channelrhodopsin                                                     | <i>wzls30 IV; lite-1(ce314) lin-15(n765ts) X</i>                         | 3       |
| <b>LX1918</b>  | vulval muscle GCaMP5, mCherry                                            | <i>lite-1(ce314) vsIs164 lin-15(n765ts) X</i>                            | 1, 2, 3 |
| <b>LX1932</b>  | HSN Channelrhodopsin, vulval muscle GCaMP5, mCherry                      | <i>wzls30 IV; lite-1(ce314) vsIs164 lin-15(n765ts) X</i>                 | 3       |
| <b>LX1938</b>  | No HSNs, vulval muscle GCaMP5, mCherry                                   | <i>egl-1(n986dm) V; lite-1(ce314) vsIs164 lin-15(n765ts) X</i>           | 4       |
| <b>LX1986</b>  | uv1 GCaMP5, mCherry                                                      | <i>vsIs177; lite-1(ce314) lin-15(n765ts) X</i>                           | 5       |
| <b>LX1960</b>  | VC GCaMP5, mCherry                                                       | <i>vsIs172; lite-1(ce314) lin-15(n765ts) X</i>                           | 1, 2    |
| <b>LX1970</b>  | HSN Channelrhodopsin, VC GCaMP5, mCherry                                 | <i>wzls30 IV; vsIs172; lite-1(ce314) lin-15(n765ts) X</i>                | 3       |
| <b>LX2004</b>  | HSN GCaMP5, mCherry                                                      | <i>lite-1(ce314), vsIs183 lin-15(n765ts) X</i>                           | 1, 2, 6 |
| <b>LX2038</b>  | <i>lgc-55</i> null mutant<br>HSN GCaMP5, mCherry                         | <i>lgc-55(tm2913) V</i><br><i>lite-1(ce314) vsIs183 lin-15(n765ts) X</i> | 6       |
| <b>MIA3</b>    | VC Channelrhodopsin                                                      | <i>keyIs3; lite-1(ce314) lin-15(n765ts) X</i>                            | 3       |
| <b>MT13113</b> | <i>tdc-1</i> null mutant;<br>no tyramine biosynthesis                    | <i>tdc-1(n3419) II</i>                                                   | 6       |
| <b>N2</b>      | Bristol strain                                                           | wild type                                                                | 6       |
| <b>OH313</b>   | <i>ser-2</i> null mutant                                                 | <i>ser-2(pk1357) X</i>                                                   | 6       |
| <b>VC125</b>   | <i>tyra-3</i> null mutant                                                | <i>tyra-3(ok325) X</i>                                                   | 6       |
| <b>QW89</b>    | <i>lgc-55</i> null mutant                                                | <i>lgc-55(tm2913) V</i>                                                  | 6       |
| <b>LX2096</b>  | vulval muscle mCherry                                                    | <i>vsIs191; lin-15(n765ts) X</i>                                         |         |
| <b>LX2081</b>  | pan-neuronal TagRFP                                                      | <i>unc-119(ed3) I; otIs356</i>                                           |         |
| <b>LX2137</b>  | vulval muscle mCherry, <i>lgc-55::gfp</i>                                | <i>vsIs191; vsEx791</i>                                                  | 6       |
| <b>LX1330</b>  | <i>lgc-55</i> mutant expressing GFP in HSN from <i>tph-1</i> promoter    | <i>lgc-55(tm2913) V; lin-15(n765ts) X</i><br><i>vsEx557</i>              | 6       |
| <b>LX1329</b>  | <i>lgc-55</i> mutant expressing LGC-55 in HSN from <i>tph-1</i> promoter | <i>lgc-55(thm2913) V; lin-15(n765ts) X</i><br><i>vsEx558</i>             | 6       |

772

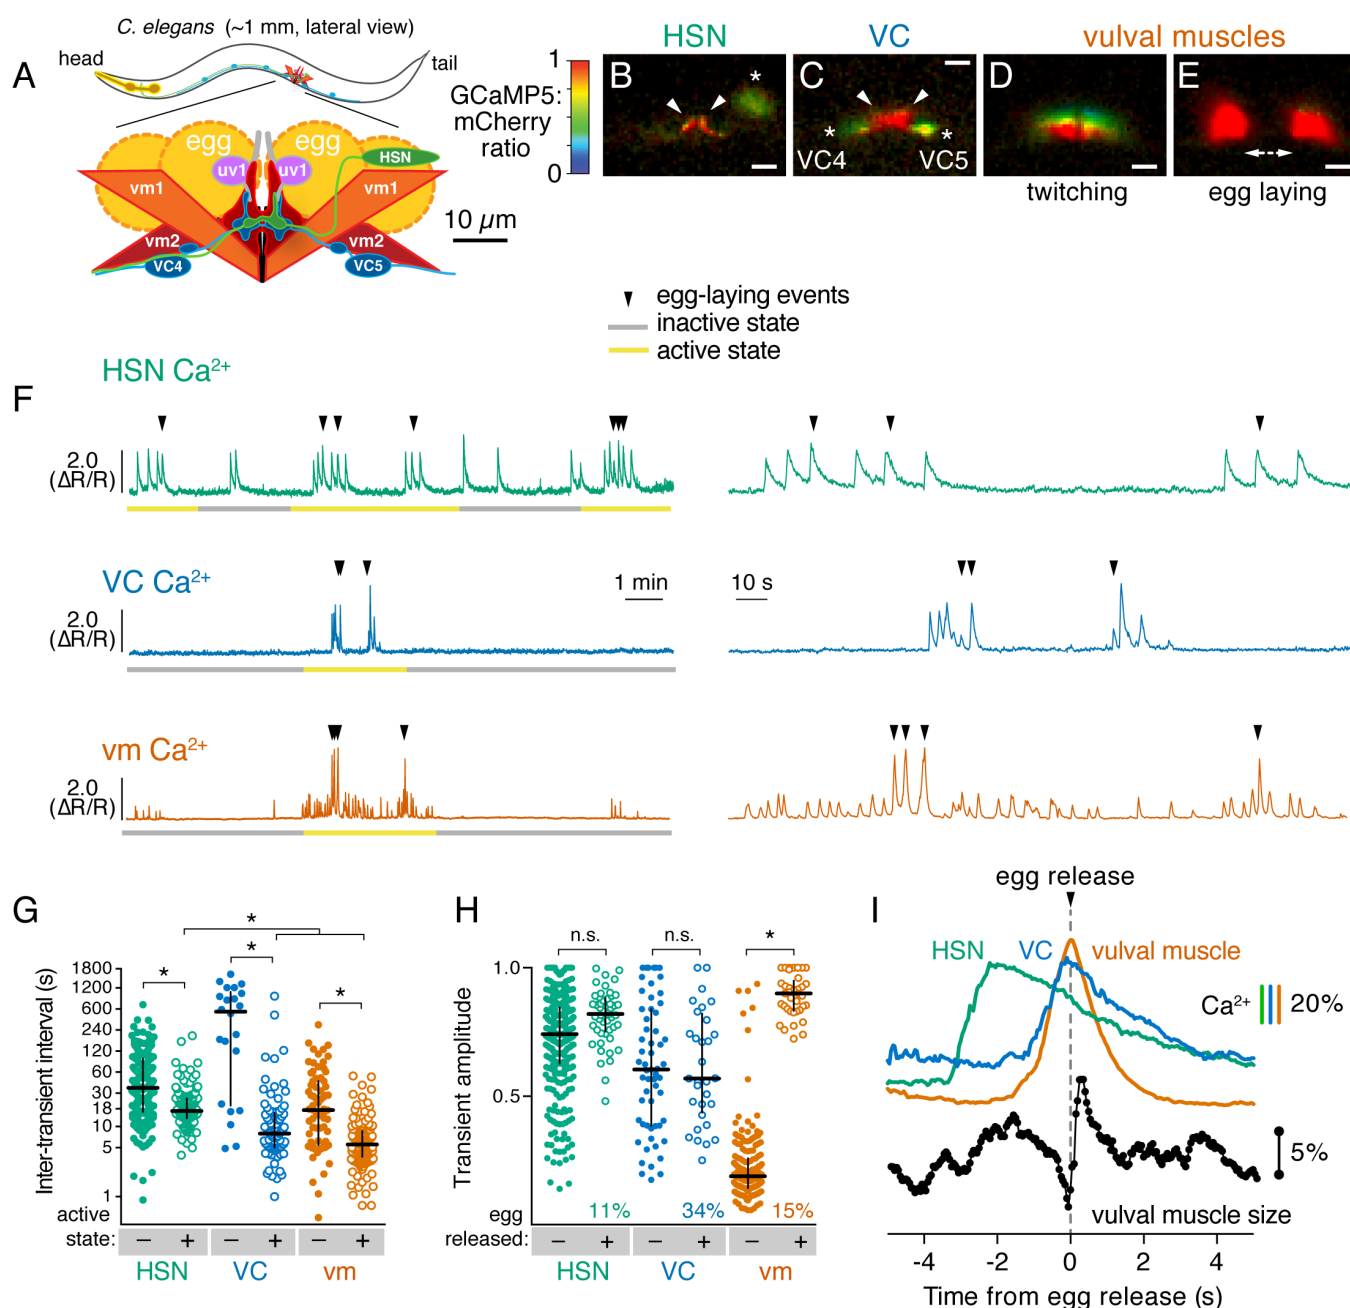

**Figure 1.** Cell-specific reporters of activity in the *C. elegans* egg-laying behavior circuit.

(A) Schematic of the circuit. HSN (green) and VC (blue) motor neurons synapse onto the vm2 muscle postsynaptic termini (center of schematic). The uv1 neuroendocrine cells (pink) extend processes (grey) along the vulval slit and vm2 postsynaptic terminus. (B-E) Individual video

frames of the GCaMP5:mCherry fluorescence ratio showing active state  $\text{Ca}^{2+}$  transients in HSNs (**B**), VCs (**C**), and vulval muscles during twitching (**D**) and egg-laying behaviors (**E**). Arrowheads, HSN and VC presynaptic termini; asterisks, cell bodies; scale bar, 10  $\mu\text{m}$ . (**F**) 30 minute recordings of HSN, VC, and vulval muscle activity (left panel), showing distinct active (yellow) and inactive (grey) egg-laying behavior states, with expanded timescale of one active state at right. Arrowheads show egg-laying events. (**G**) Scatter plots and median HSN, VC, and vulval muscle (vm) inter-transient intervals during egg-laying inactive (–, filled circles) and active (+, open circles) states. Asterisks indicate significant differences ( $p < 0.0001$ ). (**H**) Relationship between  $\text{Ca}^{2+}$  transient amplitude and egg release. Scatter plots and medians of normalized amplitude with (+; open circles) and without (–; closed circles) egg release. Also shown is the percent of total transients that accompanied egg release. (**I**) Timing of HSN, VC, and vulval muscle  $\text{Ca}^{2+}$  transients and egg release. Shown at top is a curve of the median of  $\text{Ca}^{2+}$  from HSN (green), VC (blue), and vulval muscles (orange) from normalized  $\Delta R/R$  traces (with the peak  $\text{Ca}^{2+}$  set to 100%) synchronized to the moment of egg release (0 s, arrowhead and dotted line). Bars indicate 20% change in median GCaMP/mCherry ratio. The timing of the HSN  $\text{Ca}^{2+}$  peak is significantly different from that of the VCs and vulval muscles ( $p < 0.0001$ ;  $n \geq 31$  egg-laying events). Shown at bottom is a trace of median vulval muscle size. Bar shows a 5% change in median object size based on mCherry fluorescence.

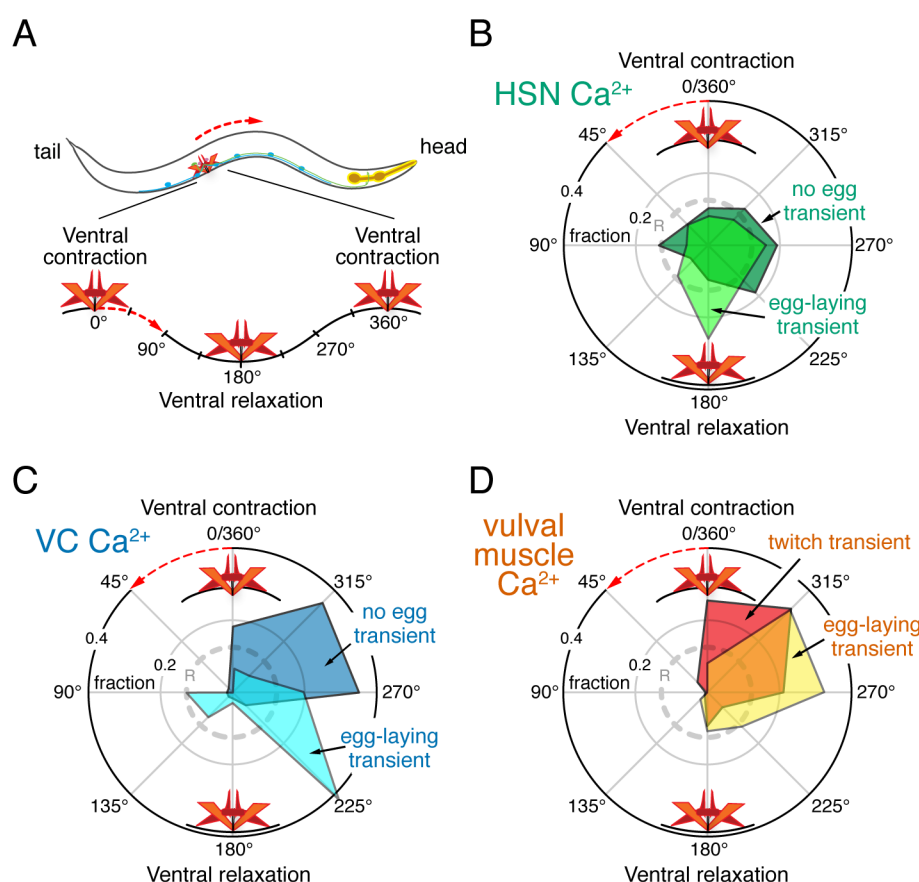

**Figure 2.** HSN, VC, and vulval muscle activity is phased with animal locomotion.

(A) The position of the vulva within a sinusoidal locomotor body bend at the moment a  $\text{Ca}^{2+}$  transient peaked was used to assign a body bend “phase”, in units of degrees, for each  $\text{Ca}^{2+}$  transient observed in HSN (B), VC (C), and vulval muscle (D) for the recordings analyzed in Figure 1. The fraction of transients observed in each of eight 45° bins was plotted on a circular histogram with ventral relaxation at 180°, and ventral contraction at 0/360°.  $\text{Ca}^{2+}$  transients that resulted in egg release had significantly different phasing from those that did not (HSN,  $p=0.0058$ ; VC,  $p=0.001$ ; vulval muscles,  $p=0.0071$ ; Mann-Whitney test). The phasing of HSN, VC, and vulval muscle transients is significantly different from a random distribution (R, dashed line at 0.125;  $p<0.05$ ) except for those HSN transients that did not result in egg release.

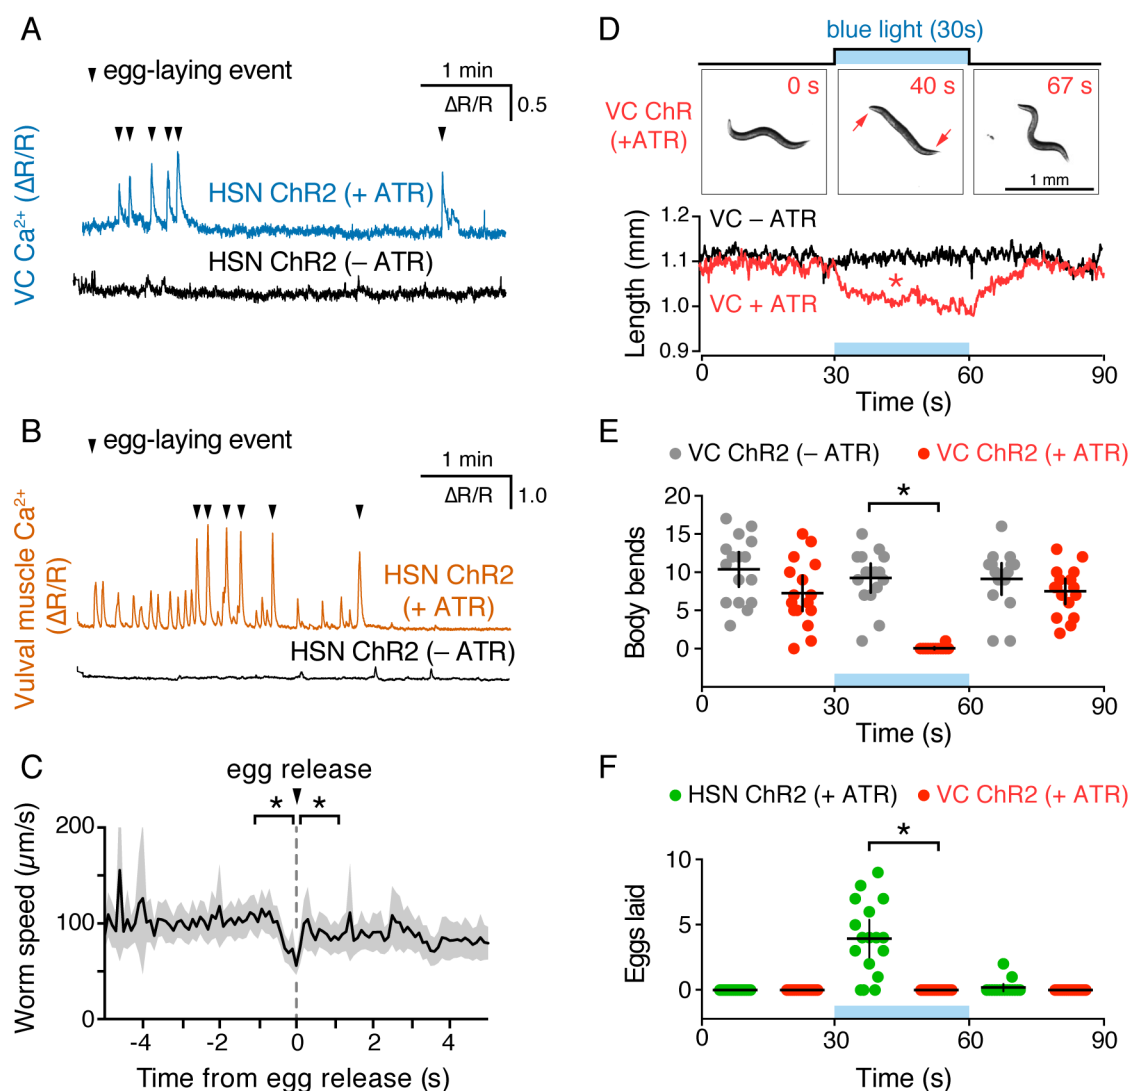

**Figure 3.** Optogenetic activation of HSN neurons initiates the egg-laying active state, and optogenetic activation of VC neurons slows locomotion.

(A) Animals expressing Channelrhodopsin-2 (ChR2) in the HSNs and GCaMP5/mCherry in the VC neurons were grown in the presence (+ATR; top, blue) or absence (-ATR; bottom, black) of all-*trans* retinal. 489 nm laser light was used to simultaneously stimulate ChR2 activity and excite GCaMP5 fluorescence during the entire recording. Arrowheads indicate egg-laying events. (B) The same experiment as (A) except that GCaMP5/mCherry were expressed in the

825 vulval muscles rather than VCs. **(C)** Brief reduction of animal speed during optogenetically-  
 826 induced egg laying. The egg-laying active state in animals expressing ChR2 in the HSN  
 827 neurons was induced with 30 s exposure to blue light. Average speed (black trace) about each  
 828 egg-laying event (0 s) was calculated from the worm centroid position, and the grey area  
 829 shows the 95% confidence interval. Average speed at the moment of egg laying release (0 s)  
 830 is reduced compared to 1 s before or after ( $p < 0.001$ ). See also Movie 4. **(D)** Activation of the  
 831 VC neurons slows locomotion but fails to induce egg laying. Animals expressing ChR2 in the  
 832 VCs were grown in the presence (+ATR; red) or absence (–ATR; black/grey) of all-*trans* retinal,  
 833 and worm length (upper photos and graph) was determined. Micrographs are still images from  
 834 a representative animal at indicated time points (see Movie 5). Inset arrows indicate regions of  
 835 the head and tail that remain mobile after VC activation. Scatter plots of body bends **(E)** and  
 836 egg laying **(F)** from the same recordings shown in D. There was a significant change in worm  
 837 length and body bends, but not egg laying, during blue light in animals grown on ATR (red;  
 838  $p < 0.0001$ ;  $n = 17$  animals). Positive control animals expressing ChR2 in the HSNs (green)  
 839 showed a significant increase in egg laying during blue light ( $p < 0.0001$ ;  $n \geq 14$  animals).

840

Collins et al., Figure 4

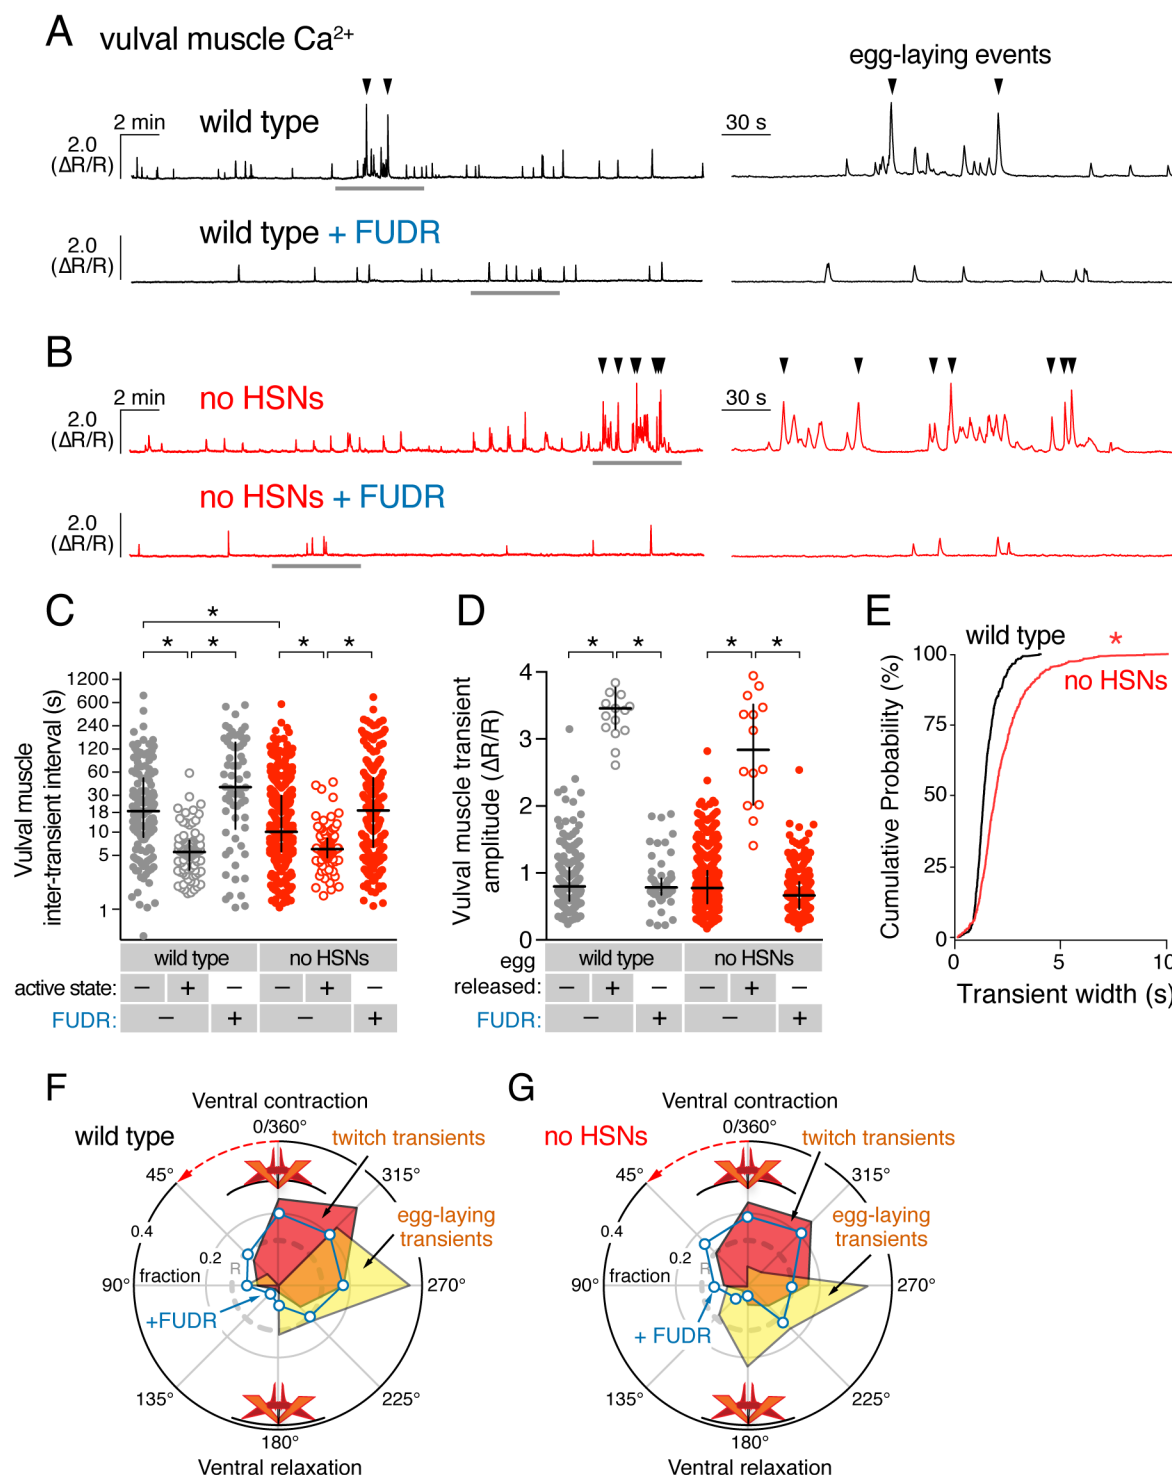

841 **Figure 4.** Active states require egg production but not the HSNs.

842 (A) Vulval muscle activity in wild-type animals either untreated or after sterilization with  
 843 floxuridine (FUDR). Left panel shows 30-minute recordings with the grey underlined regions



844 expanded at right. **(B)** Vulval muscle activity in *egl-1(n986dm)* mutants lacking HSNs. **(C-D)**  
845 Scatter plots of vulval muscle inter-transient intervals **(C)** and amplitudes **(D)**. Line indicates  
846 median, error bars indicate quartiles, and asterisks indicate significant differences ( $p < 0.01$ ). **(E)**  
847 Vulval muscle transients are wider in animals lacking HSNs. Cumulative distribution plots of  
848  $\text{Ca}^{2+}$  transient peak widths; asterisk indicates  $p < 0.0001$  (Mann-Whitney test). **(F, G)** Vulval  
849 muscle  $\text{Ca}^{2+}$  transient phasing after sterilization resembles that of the inactive state. The  
850 relative timing of peak vulval muscle  $\text{Ca}^{2+}$  transients during twitching (red), egg-laying (yellow),  
851 and after FUDR treatment (blue) are plotted as in Figure 2. Twitch, egg-laying, and FUDR  $\text{Ca}^{2+}$   
852 transient timings were significantly different from each other and from a random distribution (R,  
853 dashed line at 0.125;  $p < 0.05$ ). **(F)** Transients from 14 untreated and 5 FUDR-treated wild-type  
854 animals. **(G)** Transients from 23 untreated and 10 FUDR-treated *egl-1(n986dm)* animals.

855

856

Collins et al., Figure 5

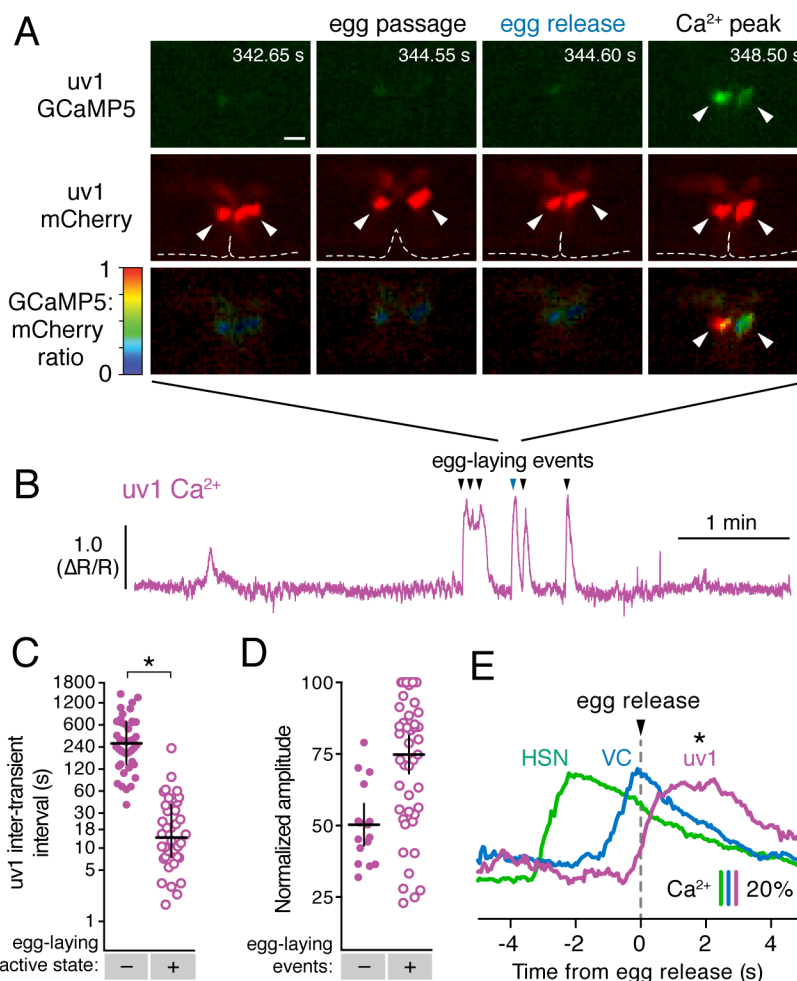

**Figure 5.** The tyraminergetic uv1 neuroendocrine cells are mechanically deformed and activated by egg laying.

(A) Fluorescence micrographs of uv1 showing GCaMP5, mCherry, and the GCaMP5/mCherry ratio before egg laying, during egg passage through the vulva, and after egg release. Times of movie frames in seconds are at top, and white scale bar is 10  $\mu$ m. Arrowheads in mCherry micrographs indicate position of uv1 cells as they are deformed by egg passage, the dotted line indicates position and opening of the vulva. (B) GCaMP5/mCherry ratio ( $\Delta R/R$ ) trace of uv1 activity, including an egg-laying active state. Egg-laying events are indicated by arrowheads. (C) Scatter plots of uv1 inter-transient intervals during the inactive (closed circles)

877 and active (open circles) egg-laying behavior states. Line indicates median, error bars indicate  
878 quartiles, and asterisks indicate significant differences ( $p < 0.0001$ ). **(D)** Scatter plots and  
879 medians of normalized amplitude with (+; open circles) and without (–; closed circles) an  
880 accompanying egg release. Error bars indicate quartiles, and asterisks indicate significant  
881 differences ( $p < 0.0001$ , Mann-Whitney test). **(E)**  $uv1$   $Ca^{2+}$  transients follow egg-laying events.  
882 Normalized traces of median  $Ca^{2+}$  in HSN (green) and VC (blue) from Figure 1 are compared  
883 to  $uv1$  (purple), synchronized to the moment of egg release (0 s, arrowhead and dotted line).  
884 Bars indicates 20% change in median GCaMP/mCherry ratio. Asterisk indicates the  $uv1$   $Ca^{2+}$   
885 peak is significantly later than the HSN and VC peaks ( $p < 0.0001$ ;  $n = 27$  egg-laying events from  
886 13 animals).

887

Collins et al., Figure 6

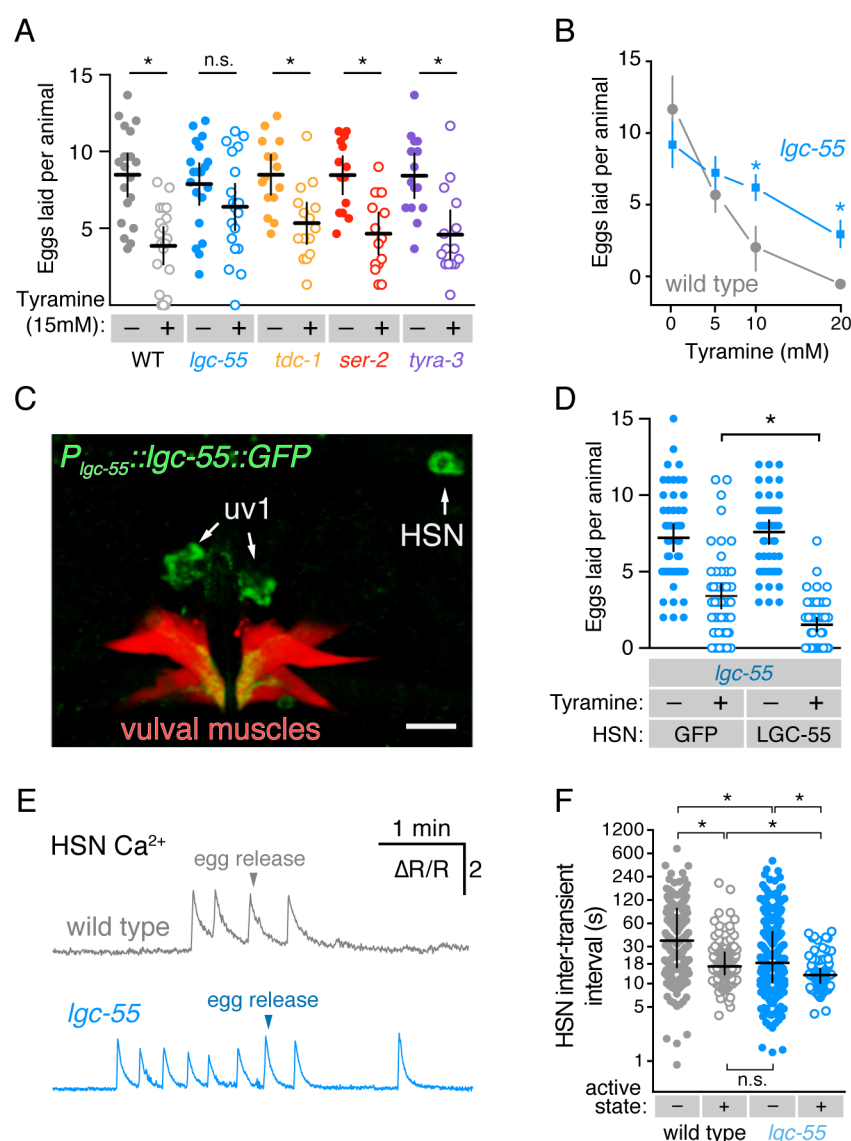

**Figure 6.** Tyramine inhibits egg laying, in part, through LGC-55 receptors on the HSNs.

(A) Exogenous tyramine inhibits egg-laying behavior and requires the LGC-55 receptor. Scatter plots and means showing the number of eggs laid after 30 minutes by wild type (grey), *tdc-1(n3419)* tyramine biosynthetic enzyme mutant (blue), and *lgc-55(tm2913)*, *ser-2(pk1357)*, and *tyra-3(ok325)* tyramine receptor mutant animals (orange, red, and purple, respectively) on plates without (-, closed circles) or with (+, open circles) 15 mM tyramine. Error bars indicate 95% confidence intervals, and asterisks indicate significant responses ( $p < 0.01$ ) while n.s. is

896 not significant ( $p>0.05$ ). **(B)** Dose-response curve of tyramine inhibition on egg laying in wild-  
897 type and *lgc-55* mutant animals. Asterisks indicate significant differences at 10 mM ( $p<0.0001$ )  
898 and 20 mM tyramine ( $p=0.0164$ ). **(C)** LGC-55 is expressed in HSN, uv1, and vulval muscles.  
899 Expression of LGC-55 tagged with GFP compared to vulval muscle mCherry was visualized  
900 using confocal microscopy; scale bar is 10  $\mu$ m. GFP is localized to the HSN and uv1 cell  
901 bodies (arrows) as well as the ventral tips of the vulval muscles. **(D)** Re-expression of LGC-55  
902 in HSN restores tyramine inhibition of egg laying. Scatter plots of eggs laid by *lgc-55* mutants  
903 expressing either GFP or *lgc-55* in the HSN from the *tph-1* promoter. Asterisk indicates  
904 significant differences in egg laying ( $p=0.0029$ ). **(E)** Loss of LGC-55 increases HSN activity.  
905 Representative  $\text{Ca}^{2+}$  ratio traces show HSN activity in wild type (top, grey) and *lgc-55* mutant  
906 animals (bottom, blue) during the active state. **(F)** Scatter plots and medians of HSN inter-  
907 transient intervals in wild type and *lgc-55* mutant animals during the egg-laying inactive (–,  
908 closed circles) and active (+, open circles) states. Asterisks indicate statistically significant  
909 differences ( $p<0.0001$ ;  $n\geq 7$  animals per genotype).

910

Collins et al., Figure 7

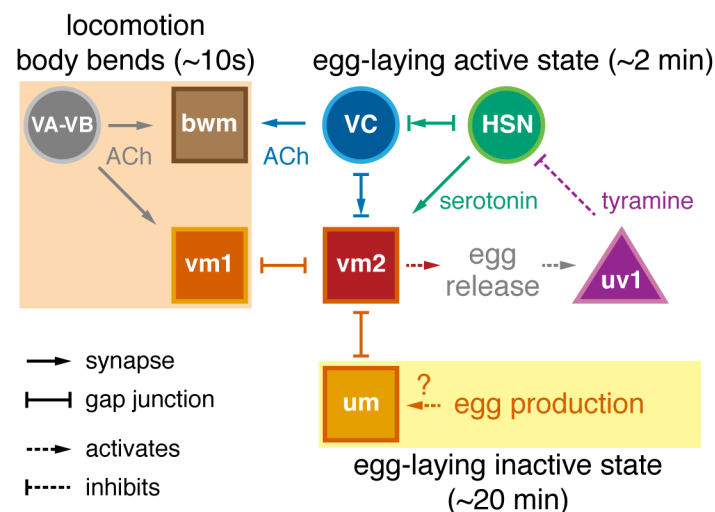

**Figure 7.** Working model of how circuit connectivity, signaling, and activity contribute to the observed rhythms that accompany the active and inactive egg-laying behavior states. VA and VB motor neuron synapses release acetylcholine (ACh) that rhythmically excites the body wall muscles (bwm) and vm1 vulval muscles during each locomotion body bend, every ~10 seconds. Eggs are produced from each gonad arm every 10 minutes, and we propose the accumulation of 2-3 eggs mechanically excites the uterine muscles (um) facilitating exit from the inactive state. Sustained bursts of HSN command motor neuron activity trigger serotonin release that drives ~2 minute active states. HSN also makes synapses and gap junctions with the cholinergic VC motor neurons, and VC makes synapses and gap junctions with the vm2 muscles whose contraction allows egg release. Passage of eggs mechanically activates the uv1 cells triggering release of tyramine and neuropeptides, which inhibit HSN activity to terminate the active state. See text for further details.

925 **Movie 1.** Ratio recording of HSN  $\text{Ca}^{2+}$  transients during the egg-laying active state. High  $\text{Ca}^{2+}$   
 926 is indicated in red while low calcium is in blue. Large panel is an expanded view showing the  
 927 freely-moving animal that has been contrast enhanced to make the worm and its laid eggs  
 928 visible. Inset is cropped to a small area containing the HSN, and stabilized to remove  
 929 movement. Text labels indicate when  $\text{Ca}^{2+}$  transients and egg release occur.

930 **Movie 2.** Ratio recording of VC  $\text{Ca}^{2+}$  transients during the egg-laying active state. High  $\text{Ca}^{2+}$   
 931 is indicated in red while low calcium is in blue. Contrast is enhanced to make the worm visible,  
 932 although the laid eggs are not easily visible. Text labels indicate when vulval muscle (vm)  
 933 twitches or egg-laying contractions occur, which result in small or large displacements of the  
 934 VC4 and VC5 cell bodies, respectively.

935 **Movie 3.** Ratio recording of vulval muscle  $\text{Ca}^{2+}$  transients during the egg-laying active state.  
 936 High  $\text{Ca}^{2+}$  is indicated in red while low calcium is in blue. Large panel is an expanded view  
 937 showing the freely-moving animal that has been contrast enhanced to make the worm and its  
 938 laid eggs visible. Inset is cropped to a small area containing the vulval muscles, and stabilized  
 939 to remove movement. Text labels indicate when  $\text{Ca}^{2+}$  transients and egg release occur.

940 **Movie 4.** Activation of the HSNs using Channelrhodopsin-2 induces the egg-laying active state.  
 941 Animals were recorded for a total of 90 seconds with continuous blue light stimulation  
 942 beginning at 30 s and ending at 60s, during which five eggs are laid. Recording is sped up 3-  
 943 fold.

944 **Movie 5.** Activation of the VCs using Channelrhodopsin-2 induces animal paralysis and  
 945 shortening of body length. Animals were recorded for a total of 90 seconds with continuous  
 946 blue light stimulation beginning at 30 s and ending at 60s. Recording is sped up 3-fold.

947 **Movie 6.** Ratio recording of uv1  $\text{Ca}^{2+}$  transients during the egg-laying active state. High  $\text{Ca}^{2+}$   
 948 is indicated in red while low calcium is in blue. Large panel is an expanded view showing the  
 949 freely-moving animal. Inset is cropped to a small area containing the uv1s, and stabilized to  
 950 remove movement. Microscope is focused to image the two uv1 cells on the right side of this  
 951 animal, while the two additional uv1 cells on the left side are out of focus and not visible. Text  
 952 labels indicate when egg releases occur, each of which is followed by a uv1  $\text{Ca}^{2+}$  transient.
